# Supplementary material for: Characterization of Seventeen Complete Mitochondrial Genomes: Structural Features and Phylogenetic Implications of the Lepidopteran Insects
Source: MDPI journal article supplement (doi:10.3390/insects13110998), 2022-10-31
Supplement: s1 [file s1]

**Table S1.1 Mitogenomic characteristics of *Zaranga tukuringra***

| Gene       | Strand | Anti-codon | Start | Stop | Length | Start codon | End codon | Intergenic nucleotide |
|------------|--------|------------|-------|------|--------|-------------|-----------|-----------------------|
| trnM(cau)  | J      | CAT        | 295   | 361  | 67     |             |           | 0                     |
| trnI(gau)  | J      | GAT        | 362   | 427  | 66     |             |           | 0                     |
| trnQ(uug)  | N      | TTG        | 425   | 493  | 69     |             |           | -3                    |
| ND2        | J      |            | 558   | 1559 | 1002   | ATT         | TAA       | 64                    |
| trnW(uca)  | J      | TCA        | 1564  | 1632 | 69     |             |           | 4                     |
| trnC(gca)  | N      | GCA        | 1625  | 1689 | 65     |             |           | -8                    |
| trnY(gua)  | N      | GTA        | 1690  | 1755 | 66     |             |           | 0                     |
| COX1       | J      |            | 1772  | 3307 | 1536   | CGA         | TAA       | 16                    |
| trnL2(uaa) | J      | TAA        | 3303  | 3370 | 68     |             |           | -5                    |
| COX2       | J      |            | 3371  | 4052 | 682    | ATG         | T         | 0                     |
| trnK(cuu)  | J      | CTT        | 4053  | 4123 | 71     |             |           | 0                     |
| trnD(guc)  | J      | GTC        | 4153  | 4217 | 65     |             |           | 29                    |
| ATP8       | J      |            | 4218  | 4379 | 162    | ATT         | TAA       | 0                     |
| ATP6       | J      |            | 4373  | 5050 | 678    | ATG         | TAA       | -7                    |
| COX3       | J      |            | 5050  | 5838 | 789    | ATG         | TAA       | -1                    |
| trnG(ucc)  | J      | TCC        | 5845  | 5909 | 65     |             |           | 6                     |
| ND3        | J      |            | 5910  | 6263 | 354    | ATT         | TAA       | 0                     |
| trnA(ugc)  | J      | TGC        | 6271  | 6334 | 64     |             |           | 7                     |
| trnR(ucg)  | J      | TCG        | 6335  | 6397 | 63     |             |           | 0                     |
| trnN(guu)  | J      | GTT        | 6398  | 6462 | 65     |             |           | 0                     |

|            |   |     |       |       |      |     |       |     |
|------------|---|-----|-------|-------|------|-----|-------|-----|
| trnS(gcu)  | J | GCT | 6465  | 6529  | 65   |     |       | 2   |
| trnE(uuc)  | J | TTC | 6577  | 6642  | 66   |     |       | 47  |
| trnF(gaa)  | N | GAA | 6644  | 6710  | 67   |     |       | 1   |
| ND5        | N |     | 6710  | 8452  | 1743 | ATT | TAA   | -1  |
| trnH(gug)  | N | GTG | 8453  | 8519  | 67   |     |       | 0   |
| ND4        | N |     | 8519  | 9864  | 1346 | ATT | TA(A) | -1  |
| ND4L       | N |     | 9858  | 10145 | 288  | ATG | TAA   | -7  |
| trnT(ugu)  | J | TGT | 10151 | 10215 | 65   |     |       | 5   |
| trnP(ugg)  | N | TGG | 10216 | 10280 | 65   |     |       | 0   |
| ND6        | J |     | 10289 | 10819 | 531  | ATA | TAA   | 8   |
| CYTB       | J |     | 10823 | 11974 | 1152 | ATG | TAA   | 3   |
| trnS2(uga) | J | TGA | 11973 | 12038 | 66   |     |       | -2  |
| ND1        | N |     | 12057 | 12992 | 936  | ATG | TAG   | 18  |
| trnL(uag)  | N | TAG | 12994 | 13063 | 70   |     |       | 1   |
| l-rRNA     | N |     | 13039 | 14411 | 1373 |     |       | -25 |
| trnV(uac)  | N | TAC | 14412 | 14479 | 68   |     |       | 0   |
| s-rRNA     | N |     | 14480 | 15287 | 808  |     |       | 0   |

**Table S1.2 Mitogenomic characteristics of *Gazalina chrysolopha***

| Gene       | Strand | Anti-codon | Start | Stop | Length | Start codon | End codon | Intergenic nucleotide |
|------------|--------|------------|-------|------|--------|-------------|-----------|-----------------------|
| trnM(cau)  | J      | CAT        | 318   | 386  | 69     |             |           | 0                     |
| trnI(gau)  | J      | GAT        | 387   | 451  | 65     |             |           | 0                     |
| trnQ(uug)  | N      | TTG        | 449   | 517  | 69     |             |           | -3                    |
| ND2        | J      |            | 574   | 1587 | 1014   | ATT         | TAG       | 56                    |
| trnW(uca)  | J      | TCA        | 1592  | 1660 | 69     |             |           | 4                     |
| trnC(gca)  | N      | GCA        | 1653  | 1718 | 66     |             |           | -8                    |
| trnY(gua)  | N      | GTA        | 1719  | 1783 | 65     |             |           | 0                     |
| COX1       | J      |            | 1825  | 3360 | 1536   | CGA         | TAA       | 41                    |
| trnL2(uaa) | J      | TAA        | 3356  | 3422 | 67     |             |           | -5                    |
| COX2       | J      |            | 3424  | 4125 | 702    | ATG         | TAA       | 1                     |
| trnK(cuu)  | J      | CTT        | 4106  | 4176 | 71     |             |           | -20                   |
| trnD(guc)  | J      | GTC        | 4203  | 4276 | 74     |             |           | 26                    |
| ATP8       | J      |            | 4277  | 4441 | 165    | ATC         | TAA       | 0                     |
| ATP6       | J      |            | 4435  | 5112 | 678    | ATG         | TAA       | -7                    |
| COX3       | J      |            | 5116  | 5904 | 789    | ATG         | TAA       | 3                     |
| trnG(ucc)  | J      | TCC        | 5908  | 5973 | 66     |             |           | 3                     |
| ND3        | J      |            | 5974  | 6327 | 354    | ATT         | TAA       | 0                     |
| trnA(ugc)  | J      | TGC        | 6354  | 6420 | 67     |             |           | 26                    |
| trnR(ucg)  | J      | TCG        | 6421  | 6483 | 63     |             |           | 0                     |
| trnN(guu)  | J      | GTT        | 6495  | 6559 | 65     |             |           | 11                    |

|            |   |     |       |       |      |     |     |     |
|------------|---|-----|-------|-------|------|-----|-----|-----|
| trnS(gcu)  | J | GCT | 6563  | 6628  | 66   |     |     | 3   |
| trnE(uuc)  | J | TTC | 6629  | 6694  | 66   |     |     | 0   |
| trnF(gaa)  | N | GAA | 6694  | 6759  | 66   |     |     | -1  |
| ND5        | N |     | 6743  | 8503  | 1761 | ATT | TAA | -17 |
| trnH(gug)  | N | GTG | 8504  | 8569  | 66   |     |     | 0   |
| ND4        | N |     | 8569  | 9908  | 1340 | ATG | TAA | -1  |
| ND4L       | N |     | 9914  | 10204 | 291  | ATG | TAG | 5   |
| trnT(ugu)  | J | TGT | 10210 | 10274 | 65   |     |     | 5   |
| trnP(ugg)  | N | TGG | 10275 | 10339 | 65   |     |     | 0   |
| ND6        | J |     | 10347 | 10880 | 534  | ATA | TAA | 7   |
| CYTB       | J |     | 10890 | 12041 | 1152 | ATA | TAA | 9   |
| trnS2(uga) | J | TGA | 12045 | 12113 | 69   |     |     | 3   |
| ND1        | N |     | 12135 | 13070 | 936  | GTG | TAA | 21  |
| trnL(uag)  | N | TAG | 13071 | 13142 | 72   |     |     | 0   |
| l-rRNA     | N |     | 13167 | 14520 | 1354 |     |     | 24  |
| trnV(uac)  | N | TAC | 14525 | 14592 | 68   |     |     | 4   |
| s-rRNA     | N |     | 14593 | 15408 | 816  |     |     | 0   |

**Table S1.3 Mitogenomic characteristics of *Derocha hyalina***

| Gene       | Strand | Anti-codon | Start | Stop | Length | Start codon | End codon | Intergenic nucleotide |
|------------|--------|------------|-------|------|--------|-------------|-----------|-----------------------|
| trnM(cau)  | J      | CAT        | 371   | 438  | 68     |             |           | 0                     |
| trnI(gau)  | J      | GAT        | 439   | 505  | 67     |             |           | 0                     |
| trnQ(uug)  | N      | TTG        | 503   | 571  | 69     |             |           | -3                    |
| ND2        | J      |            | 643   | 1647 | 1005   | ATT         | TAA       | 71                    |
| trnW(uca)  | J      | TCA        | 1656  | 1722 | 67     |             |           | 8                     |
| trnC(gca)  | N      | GCA        | 1715  | 1778 | 64     |             |           | -8                    |
| trnY(gua)  | N      | GTA        | 1779  | 1846 | 68     |             |           | 0                     |
| COX1       | J      |            | 1846  | 3384 | 1539   | TTG         | TAA       | -1                    |
| trnL2(uaa) | J      | TAA        | 3380  | 3445 | 66     |             |           | -5                    |
| COX2       | J      |            | 3446  | 4162 | 717    | ATA         | TAA       | 0                     |
| trnK(cuu)  | J      | CTT        | 4128  | 4198 | 71     |             |           | -35                   |
| trnD(guc)  | J      | GTC        | 4204  | 4271 | 68     |             |           | 5                     |
| ATP8       | J      |            | 4272  | 4436 | 165    | ATC         | TAA       | 0                     |
| ATP6       | J      |            | 4430  | 5107 | 678    | ATG         | TAA       | -7                    |
| COX3       | J      |            | 5107  | 5898 | 792    | ATG         | TAA       | -1                    |
| trnG(ucc)  | J      | TCC        | 5901  | 5966 | 66     |             |           | 2                     |
| ND3        | J      |            | 5967  | 6320 | 354    | ATC         | TAA       | 0                     |
| trnA(ugc)  | J      | TGC        | 6328  | 6392 | 65     |             |           | 7                     |
| trnR(ucg)  | J      | TCG        | 6393  | 6455 | 63     |             |           | 0                     |
| trnN(guu)  | J      | GTT        | 6460  | 6524 | 65     |             |           | 4                     |

|            |   |     |       |       |      |     |       |     |
|------------|---|-----|-------|-------|------|-----|-------|-----|
| trnS(gcu)  | J | GCT | 6535  | 6596  | 62   |     |       | 10  |
| trnE(uuc)  | J | TTC | 6593  | 6658  | 66   |     |       | -4  |
| trnF(gaa)  | N | GAA | 6666  | 6730  | 65   |     |       | 7   |
| ND5        | N |     | 6714  | 8471  | 1758 | ATA | TAA   | -17 |
| trnH(gug)  | N | GTG | 8472  | 8537  | 66   |     |       | 0   |
| ND4        | N |     | 8538  | 9877  | 1340 | ATG | TA(A) | 0   |
| ND4L       | N |     | 9884  | 10174 | 291  | ATG | TAA   | 6   |
| trnT(ugu)  | J | TGT | 10177 | 10240 | 64   |     |       | 2   |
| trnP(ugg)  | N | TGG | 10241 | 10305 | 65   |     |       | 0   |
| ND6        | J |     | 10308 | 10835 | 528  | ATA | TAA   | 2   |
| CYTB       | J |     | 10845 | 11993 | 1149 | ATG | TAA   | 9   |
| trnS2(uga) | J | TGA | 11992 | 12057 | 66   |     |       | -2  |
| ND1        | N |     | 12075 | 13010 | 936  | ATG | TAG   | 17  |
| trnL(uag)  | N | TAG | 13012 | 13082 | 71   |     |       | 1   |
| l-rRNA     | N |     | 13062 | 14452 | 1391 |     |       | -21 |
| trnV(uac)  | N | TAC | 14457 | 14525 | 69   |     |       | 4   |
| s-rRNA     | N |     | 14526 | 15308 | 783  |     |       | 0   |

**Table S1.4 Mitogenomic characteristics of *Menophra* sp.**

| Gene       | Strand | Anti-codon | Start | Stop | Length | Start codon | End codon | Intergenic nucleotide |
|------------|--------|------------|-------|------|--------|-------------|-----------|-----------------------|
| trnM(cau)  | J      | CAT        | 201   | 268  | 68     |             |           | 0                     |
| trnI(gau)  | J      | GAT        | 269   | 335  | 67     |             |           | 0                     |
| trnQ(uug)  | N      | TTG        | 349   | 417  | 69     |             |           | 13                    |
| ND2        | J      |            | 481   | 1482 | 1002   | ATA         | TAA       | 63                    |
| trnW(uca)  | J      | TCA        | 1493  | 1562 | 70     |             |           | 10                    |
| trnC(gca)  | N      | GCA        | 1555  | 1620 | 66     |             |           | -8                    |
| trnY(gua)  | N      | GTA        | 1621  | 1686 | 66     |             |           | 0                     |
| COX1       | J      |            | 1692  | 3227 | 1536   | CGA         | TAA       | 5                     |
| trnL2(uaa) | J      | TAA        | 3223  | 3289 | 67     |             |           | -5                    |
| COX2       | J      |            | 3290  | 3991 | 702    | ATG         | TAA       | 0                     |
| trnK(cuu)  | J      | CTT        | 3972  | 4041 | 70     |             |           | -20                   |
| trnD(guc)  | J      | GTC        | 4042  | 4108 | 67     |             |           | 0                     |
| ATP8       | J      |            | 4109  | 4273 | 165    | ATA         | TAA       | 0                     |
| ATP6       | J      |            | 4267  | 4944 | 678    | ATG         | TAA       | -7                    |
| COX3       | J      |            | 4951  | 5739 | 789    | ATG         | TAA       | 6                     |
| trnG(ucc)  | J      | TCC        | 5753  | 5819 | 67     |             |           | 13                    |
| ND3        | J      |            | 5820  | 6173 | 354    | ATT         | TAA       | 0                     |
| trnA(ugc)  | J      | TGC        | 6194  | 6257 | 64     |             |           | 20                    |
| trnR(ucg)  | J      | TCG        | 6258  | 6322 | 65     |             |           | 0                     |
| trnN(guu)  | J      | GTT        | 6328  | 6394 | 67     |             |           | 5                     |

|            |   |     |       |       |      |     |     |     |
|------------|---|-----|-------|-------|------|-----|-----|-----|
| trnS(gcu)  | J | GCT | 6395  | 6460  | 66   |     |     | 0   |
| trnE(uuc)  | J | TTC | 6467  | 6532  | 66   |     |     | 6   |
| trnF(gaa)  | N | GTT | 6531  | 6596  | 66   |     |     | -2  |
| ND5        | N |     | 6580  | 8334  | 1755 | ATT | TAA | -17 |
| trnH(gug)  | N | GTG | 8335  | 8400  | 66   |     |     | 0   |
| ND4        | N |     | 8404  | 9739  | 1336 | ATG | T   | 3   |
| ND4L       | N |     | 9745  | 10035 | 291  | ATG | TAA | 5   |
| trnT(ugu)  | J | TGT | 10041 | 10105 | 65   |     |     | 5   |
| trnP(ugg)  | N | TGG | 10106 | 10171 | 66   |     |     | 0   |
| ND6        | J |     | 10174 | 10707 | 534  | ATA | TAA | 2   |
| CYTB       | J |     | 10719 | 11876 | 1158 | ATA | TAA | 11  |
| trnS2(uga) | J | TGA | 11876 | 11943 | 68   |     |     | -1  |
| ND1        | N |     | 11962 | 12900 | 939  | TTG | TAA | 18  |
| trnL(uag)  | N | TAG | 12901 | 12971 | 71   |     |     | 0   |
| l-rRNA     | N |     | 12951 | 14362 | 1412 |     |     | -21 |
| trnV(uac)  | N | TAC | 14363 | 14428 | 66   |     |     | 0   |
| s-rRNA     | N |     | 14429 | 15218 | 790  |     |     | 0   |



**Table S1.5 Mitogenomic characteristics of *Dolbina paraexacta***

| Gene      | Strand | Anti-codon | Start | Stop | Length | Start codon | End codon | Intergenic nucleotide |
|-----------|--------|------------|-------|------|--------|-------------|-----------|-----------------------|
| trnM(cau) | J      | CAT        | 289   | 357  | 69     |             |           | 0                     |
| trnI(gau) | J      | GAT        | 358   | 422  | 65     |             |           | 0                     |
| trnQ(uug) | N      | TTG        | 420   | 488  | 69     |             |           | -3                    |
| ND2       | J      |            | 541   | 1554 | 1014   | ATT         | TAA       | 52                    |
| trnW(uca) | J      | TCA        | 1558  | 1624 | 67     |             |           | 3                     |
| trnC(gca) | N      | GCA        | 1617  | 1680 | 64     |             |           | -8                    |
| trnY(gua) | N      | GTA        | 1681  | 1747 | 67     |             |           | 0                     |
| COX1      | J      |            | 1756  | 3288 | 1533   | AAA         | TAA       | 8                     |
| trnL(uaa) | J      | TAA        | 3284  | 3349 | 66     |             |           | -5                    |
| COX2      | J      |            | 3350  | 4031 | 682    | ATG         | T         | 0                     |
| trnK(cuu) | J      | CTT        | 4032  | 4102 | 71     |             |           | 0                     |
| trnD(guc) | J      | GTC        | 4105  | 4171 | 67     |             |           | 2                     |
| ATP8      | J      |            | 4172  | 4333 | 162    | ATC         | TAA       | 0                     |
| ATP6      | J      |            | 4327  | 5004 | 678    | ATG         | TAA       | -7                    |
| COX3      | J      |            | 5004  | 5795 | 792    | ATG         | TAA       | -1                    |
| trnG(ucc) | J      | TCC        | 5798  | 5863 | 66     |             |           | 2                     |
| ND3       | J      |            | 5864  | 6217 | 354    | ATT         | TAA       | 0                     |
| trnA(ugc) | J      | TGC        | 6220  | 6284 | 65     |             |           | 2                     |
| trnR(ucg) | J      | TCG        | 6285  | 6351 | 67     |             |           | 0                     |
| trnN(guu) | J      | GTT        | 6356  | 6422 | 67     |             |           | 4                     |

|           |   |     |       |       |      |     |     |     |
|-----------|---|-----|-------|-------|------|-----|-----|-----|
| trnS(gcu) | J | GCT | 6425  | 6490  | 66   |     |     | 2   |
| trnE(uuc) | J | TTC | 6500  | 6566  | 67   |     |     | 9   |
| trnF(gaa) | N | GTT | 6565  | 6629  | 65   |     |     | -2  |
| ND5       | N |     | 6604  | 8352  | 1749 | ATT | TAA | -26 |
| trnH(gug) | N | GTG | 8365  | 8431  | 67   |     |     | 12  |
| ND4       | N |     | 8431  | 9765  | 1335 | ATG | TAA | -1  |
| ND4L      | N |     | 9766  | 10056 | 291  | ATG | TAA | 0   |
| trnT(ugu) | J | TGT | 10060 | 10125 | 66   |     |     | 3   |
| trnP(ugg) | N | TGG | 10125 | 10190 | 66   |     |     | -1  |
| ND6       | J |     | 10192 | 10722 | 531  | ATG | TAA | 1   |
| CYTB      | J |     | 10723 | 11877 | 1155 | ATG | TAA | 0   |
| trnS(uga) | J | TGA | 11887 | 11952 | 66   |     |     | 9   |
| ND1       | N |     | 11973 | 12908 | 936  | GTG | TAA | 20  |
| trnL(uag) | N | TAG | 12909 | 12975 | 67   |     |     | 0   |
| l-rRNA    | N |     | 12956 | 14346 | 1391 |     |     | -20 |
| trnV(uac) | N | TAC | 14348 | 14414 | 67   |     |     | 1   |
| s-rRNA    | N |     | 14415 | 15191 | 777  |     |     | 0   |

**Table S1.6 Mitogenomic characteristics of *Lassaba albidaria***

| Gene      | Strand | Anti-codon | Start | Stop | Length | Start codon | End codon | Intergenic nucleotide |
|-----------|--------|------------|-------|------|--------|-------------|-----------|-----------------------|
| trnM(cau) | J      | CAT        | 165   | 232  | 68     |             |           | 0                     |
| trnI(gau) | J      | GAT        | 233   | 299  | 67     |             |           | 0                     |
| trnQ(uug) | N      | TTG        | 311   | 379  | 69     |             |           | 11                    |
| ND2       | J      |            | 445   | 1446 | 1002   | ATA         | TAA       | 65                    |
| trnW(uca) | J      | TCA        | 1461  | 1530 | 70     |             |           | 14                    |
| trnC(gca) | N      | GCA        | 1523  | 1590 | 68     |             |           | -8                    |
| trnY(gua) | N      | GTA        | 1600  | 1665 | 66     |             |           | 9                     |
| COX1      | J      |            | 1663  | 3207 | 1545   | ATT         | TAA       | -3                    |
| trnL(uaa) | J      | TAA        | 3203  | 3269 | 67     |             |           | -5                    |
| COX2      | J      |            | 3270  | 3971 | 702    | ATG         | TAA       | 0                     |
| trnK(cuu) | J      | CTT        | 3952  | 4022 | 71     |             |           | -20                   |
| trnD(guc) | J      | GTC        | 4023  | 4088 | 66     |             |           | 0                     |
| ATP8      | J      |            | 4089  | 4253 | 165    | ATC         | TAA       | 0                     |
| ATP6      | J      |            | 4247  | 4924 | 678    | ATG         | TAA       | -7                    |
| COX3      | J      |            | 4937  | 5725 | 789    | ATG         | TAA       | 12                    |
| trnG(ucc) | J      | TCC        | 5730  | 5795 | 66     |             |           | 4                     |
| ND3       | J      |            | 5793  | 6149 | 357    | ATA         | TAA       | -3                    |
| trnA(ugc) | J      | TGC        | 6168  | 6235 | 68     |             |           | 18                    |
| trnR(ucg) | J      | TCG        | 6236  | 6299 | 64     |             |           | 0                     |
| trnN(guu) | J      | GTT        | 6300  | 6365 | 66     |             |           | 0                     |

|           |   |     |       |       |      |     |     |     |
|-----------|---|-----|-------|-------|------|-----|-----|-----|
| trnS(gcu) | J | GCT | 6384  | 6449  | 66   |     |     | 18  |
| trnE(uuc) | J | TTC | 6450  | 6515  | 66   |     |     | 0   |
| trnF(gaa) | N | GAA | 6525  | 6591  | 67   |     |     | 9   |
| ND5       | N |     | 6575  | 8329  | 1755 | ATT | TAA | -17 |
| trnH(gug) | N | GTG | 8330  | 8396  | 67   |     |     | 0   |
| ND4       | N |     | 8377  | 9735  | 1359 | ATG | TAA | -20 |
| ND4L      | N |     | 9737  | 10027 | 291  | ATG | TAA | 1   |
| trnT(ugu) | J | TGT | 10042 | 10105 | 64   |     |     | 14  |
| trnP(ugg) | N | TGG | 10106 | 10171 | 66   |     |     | 0   |
| ND6       | J |     | 10174 | 10707 | 534  | ATA | TAA | 2   |
| CYTB      | J |     | 10745 | 11896 | 1152 | ATG | TAA | 37  |
| trnS(uga) | J | TGA | 11895 | 11960 | 66   |     |     | -2  |
| ND1       | N |     | 11983 | 12927 | 945  | ATA | TAA | 22  |
| trnL(uag) | N | TAG | 12922 | 12989 | 68   |     |     | -6  |
| l-rRNA    | N |     | 13035 | 14413 | 1379 |     |     | 45  |
| trnV(uac) | N | TAC | 14408 | 14474 | 67   |     |     | -6  |
| s-rRNA    | N |     | 14475 | 15285 | 811  |     |     | 0   |

**Table S1.7 Mitogenomic characteristics of *Sphragifera sigillata***

| Gene      | Strand | Anti-codon | Start | Stop | Length | Start codon | End codon | Intergenic nucleotide |
|-----------|--------|------------|-------|------|--------|-------------|-----------|-----------------------|
| trnM(cau) | J      | CAT        | 1     | 68   | 68     |             |           | 0                     |
| trnI(gau) | J      | GAT        | 71    | 137  | 67     |             |           | 2                     |
| trnQ(uug) | N      | TTG        | 135   | 203  | 69     |             |           | -3                    |
| ND2       | J      |            | 258   | 1271 | 1014   | ATT         | TAA       | 54                    |
| trnW(uca) | J      | TCA        | 1270  | 1337 | 68     |             |           | -2                    |
| trnC(gca) | N      | GCA        | 1330  | 1393 | 64     |             |           | -8                    |
| trnY(gua) | N      | GTA        | 1403  | 1466 | 64     |             |           | 9                     |
| COX1      | J      |            | 1466  | 3004 | 1539   | TTG         | TAA       | -1                    |
| trnL(uaa) | J      | TAA        | 3000  | 3066 | 67     |             |           | -5                    |
| COX2      | J      |            | 3067  | 3748 | 682    | ATG         | T         | 0                     |
| trnK(cuu) | J      | CTT        | 3749  | 3819 | 71     |             |           | 0                     |
| trnD(guc) | J      | GTC        | 3828  | 3896 | 69     |             |           | 8                     |
| ATP8      | J      |            | 3897  | 4058 | 162    | ATA         | TAA       | 0                     |
| ATP6      | J      |            | 4052  | 4729 | 678    | ATG         | TAA       | -7                    |
| COX3      | J      |            | 4729  | 5517 | 789    | ATG         | TAA       | -1                    |
| trnG(ucc) | J      | TCC        | 5524  | 5591 | 68     |             |           | 6                     |
| ND3       | J      |            | 5589  | 5945 | 357    | ATA         | TAA       | -3                    |
| trnA(ugc) | J      | TGC        | 5989  | 6059 | 71     |             |           | 43                    |
| trnR(ucg) | J      | TCG        | 6062  | 6125 | 64     |             |           | 2                     |
| trnN(guu) | J      | GTT        | 6135  | 6199 | 65     |             |           | 9                     |

|           |   |     |       |       |      |     |       |     |
|-----------|---|-----|-------|-------|------|-----|-------|-----|
| trnS(gcu) | J | GCT | 6204  | 6269  | 66   |     |       | 4   |
| trnE(uuc) | J | TTC | 6270  | 6335  | 66   |     |       | 0   |
| trnF(gaa) | N | GTT | 6338  | 6403  | 66   |     |       | 2   |
| ND5       | N |     | 6405  | 8141  | 1737 | ATA | TAA   | 1   |
| trnH(gug) | N | GTG | 8156  | 8223  | 68   |     |       | 14  |
| ND4       | N |     | 8223  | 9562  | 1340 | ATG | TA(A) | -1  |
| ND4L      | N |     | 9574  | 9864  | 291  | ATG | TAA   | 11  |
| trnT(ugu) | J | TGT | 9867  | 9931  | 65   |     |       | 2   |
| trnP(ugg) | N | TGG | 9932  | 9997  | 66   |     |       | 0   |
| ND6       | J |     | 10005 | 10535 | 531  | ATT | TAA   | 7   |
| CYTB      | J |     | 10546 | 11694 | 1149 | ATA | TAA   | 10  |
| trnS(uga) | J | TGA | 11718 | 11784 | 67   |     |       | 23  |
| ND1       | N |     | 11806 | 12744 | 939  | ATG | TAA   | 21  |
| trnL(uag) | N | TAG | 12745 | 12815 | 71   |     |       | 0   |
| l-rRNA    | N |     | 12825 | 13797 | 973  |     |       | 9   |
| trnV(uac) | N | TAC | 14197 | 14264 | 68   |     |       | 399 |
| s-rRNA    | N |     | 14264 | 15103 | 840  |     |       | -1  |

**Table S1.8 Mitogenomic characteristics of *Asota tortuosa***

| Gene      | Strand | Anti-codon | Start | Stop | Length | Start codon | End codon | Intergenic nucleotide |
|-----------|--------|------------|-------|------|--------|-------------|-----------|-----------------------|
| trnM(cau) | J      | CAT        | 289   | 357  | 69     |             |           | 0                     |
| trnI(gau) | J      | GAT        | 358   | 422  | 65     |             |           | 0                     |
| trnQ(uug) | N      | TTG        | 420   | 488  | 69     |             |           | -3                    |
| ND2       | J      |            | 543   | 1553 | 1011   | ATA         | TAA       | 54                    |
| trnW(uca) | J      | TCA        | 1552  | 1618 | 67     |             |           | -2                    |
| trnC(gca) | N      | GCA        | 1611  | 1682 | 72     |             |           | -8                    |
| trnY(gua) | N      | GTA        | 1684  | 1747 | 64     |             |           | 1                     |
| COX1      | J      |            | 1754  | 3289 | 1536   | CGA         | TAA       | 6                     |
| trnL(uaa) | J      | TAA        | 3285  | 3351 | 67     |             |           | -5                    |
| COX2      | J      |            | 3352  | 4033 | 682    | ATG         | T         | 0                     |
| trnK(cuu) | J      | CTT        | 4034  | 4103 | 70     |             |           | 0                     |
| trnD(guc) | J      | GTC        | 4104  | 4168 | 65     |             |           | 0                     |
| ATP8      | J      |            | 4169  | 4333 | 165    | ATT         | TAA       | 0                     |
| ATP6      | J      |            | 4323  | 5000 | 678    | ATG         | TAG       | -11                   |
| COX3      | J      |            | 5008  | 5796 | 789    | ATG         | TAA       | 7                     |
| trnG(ucc) | J      | TCC        | 5802  | 5868 | 67     |             |           | 5                     |
| ND3       | J      |            | 5869  | 6222 | 354    | ATT         | TAA       | 0                     |
| trnA(ugc) | J      | TGC        | 6257  | 6321 | 65     |             |           | 34                    |
| trnR(ucg) | J      | TCG        | 6326  | 6390 | 65     |             |           | 4                     |
| trnN(guu) | J      | GTT        | 6392  | 6456 | 65     |             |           | 1                     |

|           |   |     |       |       |      |     |       |    |
|-----------|---|-----|-------|-------|------|-----|-------|----|
| trnS(gcu) | J | GCT | 6469  | 6534  | 66   |     |       | 12 |
| trnE(uuc) | J | TTC | 6540  | 6605  | 66   |     |       | 5  |
| trnF(gaa) | N | GAA | 6604  | 6671  | 68   |     |       | -2 |
| ND5       | N |     | 6678  | 8423  | 1746 | ATA | TAA   | 6  |
| trnH(gug) | N | GTG | 8424  | 8491  | 68   |     |       | 0  |
| ND4       | N |     | 8491  | 9830  | 1340 | ATG | TA(A) | -1 |
| ND4L      | N |     | 9837  | 10124 | 288  | ATG | TAA   | 6  |
| trnT(ugu) | J | TGT | 10130 | 10193 | 64   |     |       | 5  |
| trnP(ugg) | N | TGG | 10194 | 10259 | 66   |     |       | 0  |
| ND6       | J |     | 10270 | 10794 | 525  | ATT | TAA   | 10 |
| CYTB      | J |     | 10824 | 11981 | 1158 | ATG | TAA   | 29 |
| trnS(uga) | J | TGA | 11980 | 12044 | 65   |     |       | -2 |
| ND1       | N |     | 12069 | 13004 | 936  | ATG | TAA   | 24 |
| trnL(uag) | N | TAG | 13006 | 13073 | 68   |     |       | 1  |
| l-rRNA    | N |     | 13106 | 14493 | 1388 |     |       | 32 |
| trnV(uac) | N | TAC | 14495 | 14562 | 68   |     |       | 1  |
| s-rRNA    | N |     | 14562 | 15370 | 809  |     |       | -1 |



**Table S1.9 Mitogenomic characteristics of *Olivenebula oberthueri***

| Gene      | Strand | Anti-codon | Start | Stop | Length | Start codon | End codon | Intergenic nucleotide |
|-----------|--------|------------|-------|------|--------|-------------|-----------|-----------------------|
| trnM(cau) | J      | CAT        | 234   | 302  | 69     |             |           | 0                     |
| trnI(gau) | J      | GAT        | 303   | 366  | 64     |             |           | 0                     |
| trnQ(uug) | N      | TTG        | 364   | 432  | 69     |             |           | -3                    |
| ND2       | J      |            | 482   | 1495 | 1014   | ATT         | TAA       | 49                    |
| trnW(uca) | J      | TCA        | 1494  | 1562 | 69     |             |           | -2                    |
| trnC(gca) | N      | GCA        | 1555  | 1619 | 65     |             |           | -8                    |
| trnY(gua) | N      | GTA        | 1636  | 1699 | 64     |             |           | 16                    |
| COX1      | J      |            | 1702  | 3237 | 1536   | CGA         | TAA       | 2                     |
| trnL(uaa) | J      | TAA        | 3233  | 3299 | 67     |             |           | -5                    |
| COX2      | J      |            | 3300  | 3981 | 682    | ATG         | T         | 0                     |
| trnK(cuu) | J      | CTT        | 3982  | 4052 | 71     |             |           | 0                     |
| trnD(guc) | J      | GTC        | 4063  | 4135 | 73     |             |           | 10                    |
| ATP8      | J      |            | 4136  | 4297 | 162    | ATA         | TAA       | 0                     |
| ATP6      | J      |            | 4291  | 4968 | 678    | ATG         | TAA       | -7                    |
| COX3      | J      |            | 4968  | 5756 | 789    | ATG         | TAA       | -1                    |
| trnG(ucc) | J      | TCC        | 5759  | 5823 | 65     |             |           | 2                     |
| ND3       | J      |            | 5821  | 6177 | 357    | ATA         | TAA       | -3                    |
| trnA(ugc) | J      | TGC        | 6189  | 6255 | 67     |             |           | 11                    |
| trnR(ucg) | J      | TCG        | 6257  | 6320 | 64     |             |           | 1                     |
| trnN(guu) | J      | GTT        | 6321  | 6385 | 65     |             |           | 0                     |

|           |   |     |       |       |      |     |       |     |
|-----------|---|-----|-------|-------|------|-----|-------|-----|
| trnS(gcu) | J | GCT | 6393  | 6458  | 66   |     |       | 7   |
| trnE(uuc) | J | TTC | 6459  | 6526  | 68   |     |       | 0   |
| trnF(gaa) | N | GTT | 6525  | 6591  | 67   |     |       | -2  |
| ND5       | N |     | 6602  | 8347  | 1746 | ATT | TAA   | 10  |
| trnH(gug) | N | GTG | 8348  | 8413  | 66   |     |       | 0   |
| ND4       | N |     | 8413  | 9752  | 1340 | ATG | TA(A) | -1  |
| ND4L      | N |     | 9786  | 10076 | 291  | ATG | TAG   | 33  |
| trnT(ugu) | J | TGT | 10079 | 10143 | 65   |     |       | 2   |
| trnP(ugg) | N | TGG | 10144 | 10208 | 65   |     |       | 0   |
| ND6       | J |     | 10216 | 10749 | 534  | ATC | TAA   | 7   |
| CYTB      | J |     | 10850 | 12001 | 1152 | ATG | TAA   | 100 |
| trnS(uga) | J | TGA | 12016 | 12081 | 66   |     |       | 14  |
| ND1       | N |     | 12099 | 13037 | 939  | ATG | TAA   | 17  |
| trnL(uag) | N | TAG | 13039 | 13106 | 68   |     |       | 1   |
| l-rRNA    | N |     | 13157 | 14510 | 1354 |     |       | 50  |
| trnV(uac) | N | TAC | 14511 | 14575 | 65   |     |       | 0   |
| s-rRNA    | N |     | 14576 | 15389 | 814  |     |       | 0   |

**Table S1.10 Mitogenomic characteristics of *Psyra falcipennis***

| Gene      | Strand | Anti-codon | Start | Stop | Length | Start codon | End codon | Intergenic nucleotide |
|-----------|--------|------------|-------|------|--------|-------------|-----------|-----------------------|
| trnM(cau) | J      | CAT        | 376   | 441  | 66     |             |           | 0                     |
| trnI(gau) | J      | GAT        | 442   | 509  | 68     |             |           | 0                     |
| trnQ(uug) | N      | TTG        | 507   | 575  | 69     |             |           | -3                    |
| ND2       | J      |            | 647   | 1648 | 1002   | ATA         | TAA       | 71                    |
| trnW(uca) | J      | TCA        | 1661  | 1728 | 68     |             |           | 12                    |
| trnC(gca) | N      | GCA        | 1729  | 1795 | 67     |             |           | 0                     |
| trnY(gua) | N      | GTA        | 1800  | 1865 | 66     |             |           | 4                     |
| COX1      | J      |            | 1878  | 3413 | 1536   | CGA         | TAA       | 12                    |
| trnL(uaa) | J      | TAA        | 3409  | 3475 | 67     |             |           | -5                    |
| COX2      | J      |            | 3476  | 4177 | 702    | ATG         | TAA       | 0                     |
| trnK(cuu) | J      | CTT        | 4158  | 4228 | 71     |             |           | -20                   |
| trnD(guc) | J      | GTC        | 4228  | 4295 | 68     |             |           | -1                    |
| ATP8      | J      |            | 4296  | 4460 | 165    | ATT         | TAA       | 0                     |
| ATP6      | J      |            | 4454  | 5131 | 678    | ATG         | TAA       | -7                    |
| COX3      | J      |            | 5154  | 5942 | 789    | ATG         | TAA       | 22                    |
| trnG(ucc) | J      | TCC        | 5957  | 6022 | 66     |             |           | 14                    |
| ND3       | J      |            | 6023  | 6376 | 354    | ATT         | TAA       | 0                     |
| trnA(ugc) | J      | TGC        | 6393  | 6458 | 66     |             |           | 16                    |
| trnR(ucg) | J      | TCG        | 6459  | 6524 | 66     |             |           | 0                     |
| trnN(guu) | J      | GTT        | 6525  | 6590 | 66     |             |           | 0                     |

|           |   |     |       |       |      |     |       |    |
|-----------|---|-----|-------|-------|------|-----|-------|----|
| trnS(gcu) | J | GCT | 6591  | 6656  | 66   |     |       | 0  |
| trnE(uuc) | J | TTC | 6664  | 6730  | 67   |     |       | 7  |
| trnF(gaa) | N | GAA | 6729  | 6794  | 66   |     |       | -2 |
| ND5       | N |     | 6794  | 8535  | 1742 | ATT | TA(A) | -1 |
| trnH(gug) | N | GTG | 8536  | 8601  | 66   |     |       | 0  |
| ND4       | N |     | 8605  | 9940  | 1336 | ATG | T     | 3  |
| ND4L      | N |     | 9940  | 10230 | 291  | ATG | TAA   | -1 |
| trnT(ugu) | J | TGT | 10233 | 10297 | 65   |     |       | 2  |
| trnP(ugg) | N | TGG | 10298 | 10362 | 65   |     |       | 0  |
| ND6       | J |     | 10365 | 10898 | 534  | ATA | TAA   | 2  |
| CYTB      | J |     | 10950 | 12101 | 1152 | ATG | TAA   | 51 |
| trnS(uga) | J | TGA | 12101 | 12166 | 66   |     |       | -1 |
| ND1       | N |     | 12185 | 13120 | 936  | TTG | TAA   | 18 |
| trnL(uag) | N | TAG | 13121 | 13189 | 69   |     |       | 0  |
| l-rRNA    | N |     | 13210 | 14593 | 1384 |     |       | 20 |
| trnV(uac) | N | TAC | 14594 | 14658 | 65   |     |       | 0  |
| s-rRNA    | N |     | 14659 | 15454 | 796  |     |       | 0  |

**Table S1.11 Mitogenomic characteristics of *Numenes albofascia***

| Gene      | Strand | Anti-codon | Start | Stop | Length | Start codon | End codon | Intergenic nucleotide |
|-----------|--------|------------|-------|------|--------|-------------|-----------|-----------------------|
| trnM(cau) | J      | CAT        | 379   | 446  | 68     |             |           | 0                     |
| trnI(gau) | J      |            | 453   | 519  | 67     |             |           | 6                     |
| trnQ(uug) | N      | TTG        | 524   | 592  | 69     |             |           | 4                     |
| ND2       | J      |            | 649   | 1662 | 1014   | ATT         | TAA       | 56                    |
| trnW(uca) | J      | TCA        | 1668  | 1739 | 72     |             |           | 5                     |
| trnC(gca) | N      | GCA        | 1732  | 1797 | 66     |             |           | -8                    |
| trnY(gua) | N      | GTA        | 1812  | 1879 | 68     |             |           | 14                    |
| COX1      | J      |            | 1884  | 3419 | 1536   | CGA         | TAA       | 4                     |
| trnL(uaa) | J      | TAA        | 3415  | 3482 | 68     |             |           | -5                    |
| COX2      | J      |            | 3483  | 4164 | 682    | ATT         | T         | 0                     |
| trnK(cuu) | J      | CTT        | 4165  | 4235 | 71     |             |           | 0                     |
| trnD(guc) | J      | GTC        | 4300  | 4366 | 67     |             |           | 64                    |
| ATP8      | J      |            | 4367  | 4528 | 162    | ATT         | TAA       | 0                     |
| ATP6      | J      |            | 4522  | 5199 | 678    | ATG         | TAA       | -7                    |
| COX3      | J      |            | 5199  | 5987 | 789    | ATG         | TAA       | -1                    |
| trnG(ucc) | J      | TCC        | 5990  | 6055 | 66     |             |           | 2                     |
| ND3       | J      |            | 6056  | 6382 | 327    | ATC         | AAT       | 0                     |
| trnA(ugc) | J      | TGC        | 6458  | 6524 | 67     |             |           | 75                    |
| trnR(ucg) | J      | TCG        | 6586  | 6651 | 66     |             |           | 61                    |
| trnN(guu) | J      | GTT        | 6652  | 6719 | 68     |             |           | 0                     |

|           |   |     |       |       |      |     |       |    |
|-----------|---|-----|-------|-------|------|-----|-------|----|
| trnS(gcu) | J | GCT | 6725  | 6793  | 69   |     |       | 5  |
| trnE(uuc) | J | TTC | 6795  | 6862  | 68   |     |       | 1  |
| trnF(gaa) | N | GTT | 6875  | 6941  | 67   |     |       | 12 |
| ND5       | N |     | 6951  | 8693  | 1743 | ATT | TAA   | 9  |
| trnH(gug) | N | GTG | 8694  | 8758  | 65   |     |       | 0  |
| ND4       | N |     | 8758  | 10097 | 1340 | ATG | TA(A) | -1 |
| ND4L      | N |     | 10135 | 10425 | 291  | ATG | TAA   | 37 |
| trnT(ugu) | J | TGT | 10431 | 10497 | 67   |     |       | 5  |
| trnP(ugg) | N | TGG | 10498 | 10562 | 65   |     |       | 0  |
| ND6       | J |     | 10572 | 11102 | 531  | ATA | TAA   | 9  |
| CYTB      | J |     | 11110 | 12258 | 1149 | ATA | TAA   | 7  |
| trnS(uga) | J | TGA | 12258 | 12324 | 67   |     |       | -1 |
| ND1       | N |     | 12376 | 13314 | 939  | ATA | TAA   | 51 |
| trnL(uag) | N | TAG | 13315 | 13382 | 68   |     |       | 0  |
| l-rRNA    | N |     | 13467 | 14837 | 1371 |     |       | 84 |
| trnV(uac) | N | TAC | 14839 | 14906 | 68   |     |       | 1  |
| s-rRNA    | N |     | 14907 | 15756 | 850  |     |       | 0  |

**Table S1.12 Mitogenomic characteristics of *Rhagastis albomarginatus***

| Gene      | Strand | Anti-codon | Start | Stop | Length | Start codon | End codon | Intergenic nucleotide |
|-----------|--------|------------|-------|------|--------|-------------|-----------|-----------------------|
| trnM(cau) | J      | CAT        | 414   | 481  | 68     |             |           |                       |
| trnI(gau) | J      | GAT        | 483   | 547  | 65     |             |           | 1                     |
| trnQ(uug) | N      | TTG        | 545   | 613  | 69     |             |           | -3                    |
| ND2       | J      |            | 667   | 1680 | 1014   | ATT         | TAA       | 53                    |
| trnW(uca) | J      | TCA        | 1683  | 1749 | 67     |             |           | 2                     |
| trnC(gca) | N      | GCA        | 1742  | 1805 | 64     |             |           | -8                    |
| trnY(gua) | N      | GTA        | 1806  | 1869 | 64     |             |           | 0                     |
| COX1      | J      |            | 1879  | 3414 | 1536   | CGA         | TAA       | 9                     |
| trnL(uaa) | J      | TAA        | 3410  | 3476 | 67     |             |           | -5                    |
| COX2      | J      |            | 3477  | 4156 | 680    | ATG         | TA(A)     | 0                     |
| trnK(cuu) | J      | CTT        | 4159  | 4228 | 70     |             |           | 2                     |
| trnD(guc) | J      | GTC        | 4229  | 4294 | 66     |             |           | 0                     |
| ATP8      | J      |            | 4295  | 4456 | 162    | ATC         | TAA       | 0                     |
| ATP6      | J      |            | 4450  | 5124 | 675    | ATG         | TAA       | -7                    |
| COX3      | J      |            | 5128  | 5919 | 792    | ATG         | TAA       | 3                     |
| trnG(ucc) | J      | TCC        | 5922  | 5987 | 66     |             |           | 2                     |
| ND3       | J      |            | 5988  | 6341 | 354    | ATT         | TAG       | 0                     |
| trnA(ugc) | J      | TGC        | 6340  | 6405 | 66     |             |           | -2                    |
| trnR(ucg) | J      | TCG        | 6406  | 6470 | 65     |             |           | 0                     |
| trnN(guu) | J      | GTT        | 6471  | 6537 | 67     |             |           | 0                     |

|           |   |     |       |       |      |     |     |     |
|-----------|---|-----|-------|-------|------|-----|-----|-----|
| trnS(gcu) | J | GCT | 6538  | 6604  | 67   |     |     | 0   |
| trnE(uuc) | J | TTC | 6620  | 6685  | 66   |     |     | 15  |
| trnF(gaa) | N | GAA | 6686  | 6749  | 64   |     |     | 0   |
| ND5*      | N |     | 6733  | 7332  | 600  | ATT | TAA | -17 |
| trnH(gug) | N | GTG | 7384  | 7449  | 66   |     |     | 51  |
| ND4       | N |     | 7455  | 8786  | 1332 | ATG | TAA | 5   |
| ND4L      | N |     | 8788  | 9078  | 291  | ATG | TAA | 1   |
| trnT(ugu) | J | TGT | 9088  | 9153  | 66   |     |     | 9   |
| trnP(ugg) | N | TGG | 9153  | 9217  | 65   |     |     | -1  |
| ND6       | J |     | 9226  | 9756  | 531  | ATG | TAA | 8   |
| CYTB      | J |     | 9756  | 10904 | 1149 | ATG | TAA | -1  |
| trnS(uga) | J | TGA | 10911 | 10974 | 64   |     |     | 6   |
| ND1       | N |     | 11003 | 11938 | 936  | ATG | TAG | 28  |
| trnL(uag) | N | TAG | 11940 | 12006 | 67   |     |     | 1   |
| l-rRNA    | N |     | 11986 | 13356 | 1371 |     |     | -21 |
| trnV(uac) | N | TAC | 13358 | 13422 | 65   |     |     | 1   |
| s-rRNA    | N |     | 13423 | 14231 | 809  |     |     | 0   |

\* Note: the position and length of ND5 may need further validation.



**Table S1.13 Mitogenomic characteristics of *Dolbina inexacta***

| Gene      | Strand | Anti-codon | Start | Stop | Length | Start codon | End codon | Intergenic nucleotide |
|-----------|--------|------------|-------|------|--------|-------------|-----------|-----------------------|
| trnM(cau) | J      | CAT        | 221   | 288  | 68     |             |           |                       |
| trnI(gau) | J      | GAT        | 289   | 353  | 65     |             |           | 0                     |
| trnQ(uug) | N      | TTG        | 351   | 419  | 69     |             |           | -3                    |
| ND2       | J      |            | 472   | 1485 | 1014   | ATT         | TAA       | 52                    |
| trnW(uca) | J      | TCA        | 1489  | 1555 | 67     |             |           | 3                     |
| trnC(gca) | N      | GCA        | 1548  | 1611 | 64     |             |           | -8                    |
| trnY(gua) | N      | GTA        | 1612  | 1678 | 67     |             |           | 0                     |
| COX1      | J      |            | 1687  | 3219 | 1533   | AAA         | TAA       | 8                     |
| trnL(uaa) | J      | TAA        | 3215  | 3280 | 66     |             |           | -5                    |
| COX2      | J      |            | 3281  | 3962 | 682    | ATG         | T         | 0                     |
| trnK(cuu) | J      | CTT        | 3963  | 4033 | 71     |             |           | 0                     |
| trnD(guc) | J      | GTC        | 4036  | 4101 | 66     |             |           | 2                     |
| ATP8      | J      |            | 4102  | 4263 | 162    | ATC         | TAA       | 0                     |
| ATP6      | J      |            | 4257  | 4934 | 678    | ATG         | TAA       | -7                    |
| COX3      | J      |            | 4934  | 5725 | 792    | ATG         | TAA       | -1                    |
| trnG(ucc) | J      | TCC        | 5728  | 5794 | 67     |             |           | 2                     |
| ND3       | J      |            | 5795  | 6148 | 354    | ATT         | TAA       | 0                     |
| trnA(ugc) | J      | TGC        | 6151  | 6215 | 65     |             |           | 2                     |
| trnR(ucg) | J      | TCG        | 6216  | 6282 | 67     |             |           | 0                     |
| trnN(guu) | J      | GTT        | 6287  | 6352 | 66     |             |           | 4                     |

|           |   |     |       |       |      |     |     |     |
|-----------|---|-----|-------|-------|------|-----|-----|-----|
| trnS(gcu) | J | GCT | 6355  | 6420  | 66   |     |     | 2   |
| trnE(uuc) | J | TTC | 6431  | 6497  | 67   |     |     | 10  |
| trnF(gaa) | N | GAA | 6496  | 6560  | 65   |     |     | -2  |
| ND5       | N |     | 6535  | 8283  | 1749 | ATT | TAA | -26 |
| trnH(gug) | N | GTG | 8296  | 8362  | 67   |     |     | 22  |
| ND4       | N |     | 8362  | 9696  | 1335 | ATG | TAA | -1  |
| ND4L      | N |     | 9697  | 9987  | 291  | ATG | TAA | 0   |
| trnT(ugu) | J | TGT | 9991  | 10056 | 66   |     |     | 3   |
| trnP(ugg) | N | TGG | 10056 | 10121 | 66   |     |     | -1  |
| ND6       | J |     | 10123 | 10653 | 531  | ATG | TAA | 1   |
| CYTB      | J |     | 10654 | 11808 | 1155 | ATG | TAA | 0   |
| trnS(uga) | J | TGA | 11818 | 11883 | 66   |     |     | 9   |
| ND1       | N |     | 11904 | 12839 | 936  | GTG | TAA | 20  |
| trnL(uag) | N | TAG | 12840 | 12906 | 67   |     |     | 0   |
| l-rRNA    | N |     | 12887 | 14287 | 1401 |     |     | -20 |
| trnV(uac) | N | TAC | 14289 | 14355 | 67   |     |     | 1   |
| s-rRNA    | N |     | 14356 | 15167 | 812  |     |     | 0   |

**Table S1.14 Mitogenomic characteristics of *Paralebeda femorata***

| Gene      | Strand | Anti-codon | Start | Stop | Length | Start codon | End codon | Intergenic nucleotide |
|-----------|--------|------------|-------|------|--------|-------------|-----------|-----------------------|
| trnM(cau) | J      | CAT        | 280   | 348  | 69     |             |           |                       |
| trnI(gau) | J      | GAT        | 351   | 415  | 65     |             |           | 2                     |
| trnQ(uug) | N      | TTG        | 435   | 503  | 69     |             |           | 19                    |
| ND2       | J      |            | 552   | 1565 | 1014   | ATA         | TAA       | 48                    |
| trnW(uca) | J      | TCA        | 1564  | 1631 | 68     |             |           | -2                    |
| trnC(gca) | N      | GCA        | 1624  | 1689 | 66     |             |           | -8                    |
| trnY(gua) | N      | GTA        | 1693  | 1758 | 66     |             |           | 3                     |
| COX1      | J      |            | 1776  | 3314 | 1539   | AAG         | TAA       | 17                    |
| trnL(uaa) | J      | TAA        | 3310  | 3376 | 67     |             |           | -5                    |
| COX2      | J      |            | 3377  | 4058 | 682    | ATA         | T         | 0                     |
| trnK(cuu) | J      | CTT        | 4059  | 4129 | 71     |             |           | 0                     |
| trnD(guc) | J      | GTC        | 4131  | 4199 | 69     |             |           | 1                     |
| ATP8      | J      |            | 4200  | 4373 | 174    | ATC         | TAA       | 0                     |
| ATP6      | J      |            | 4367  | 5044 | 678    | ATG         | TAA       | -7                    |
| COX3      | J      |            | 5054  | 5842 | 789    | ATG         | TAA       | 9                     |
| trnG(ucc) | J      | TCC        | 5845  | 5913 | 69     |             |           | 2                     |
| ND3       | J      |            | 5917  | 6267 | 351    | ATT         | TAA       | 3                     |
| trnA(ugc) | J      | TGC        | 6268  | 6334 | 67     |             |           | 0                     |
| trnR(ucg) | J      | TCG        | 6348  | 6414 | 67     |             |           | 13                    |
| trnN(guu) | J      | GTT        | 6418  | 6483 | 66     |             |           | 3                     |

|           |   |     |       |       |      |     |       |    |
|-----------|---|-----|-------|-------|------|-----|-------|----|
| trnS(gcu) | J | GCT | 6492  | 6558  | 67   |     |       | 8  |
| trnE(uuc) | J | TTC | 6559  | 6626  | 68   |     |       | 0  |
| trnF(gaa) | N | GTT | 6628  | 6694  | 67   |     |       | 1  |
| ND5       | N |     | 6703  | 8445  | 1743 | ATT | TAG   | 8  |
| trnH(gug) | N | GTG | 8446  | 8511  | 66   |     |       | 0  |
| ND4       | N |     | 8511  | 9850  | 1340 | ATG | TA(A) | -1 |
| ND4L      | N |     | 9905  | 10198 | 294  | ATG | TAA   | 54 |
| trnT(ugu) | J | TGT | 10203 | 10267 | 65   |     |       | 4  |
| trnP(ugg) | N | TGG | 10268 | 10332 | 65   |     |       | 0  |
| ND6       | J |     | 10335 | 10862 | 528  | ATA | TAA   | 2  |
| CYTB      | J |     | 10876 | 12024 | 1149 | ATG | TAA   | 13 |
| trnS(uga) | J | TGA | 12023 | 12089 | 67   |     |       | -2 |
| ND1       | N |     | 12093 | 13043 | 951  | ATG | TAG   | 3  |
| trnL(uag) | N | TAG | 13045 | 13113 | 69   |     |       | 1  |
| l-rRNA    | N |     | 13121 | 14492 | 1372 |     |       | 7  |
| trnV(uac) | N | TAC | 14493 | 14557 | 65   |     |       | 0  |
| s-rRNA    | N |     | 14558 | 15354 | 797  |     |       | 0  |

**Table S1.15 Mitogenomic characteristics of *Zeuzera pyrina***

| Gene      | Strand | Anti-codon | Start | Stop | Length | Start codon | End codon | Intergenic nucleotide |
|-----------|--------|------------|-------|------|--------|-------------|-----------|-----------------------|
| trnM(cau) | J      | CAT        | 322   | 388  | 67     |             |           |                       |
| trnI(gau) | J      | GAT        | 390   | 455  | 66     |             |           | 1                     |
| trnQ(uug) | N      | TTG        | 453   | 521  | 69     |             |           | -3                    |
| ND2       | J      |            | 609   | 1622 | 1014   | ATT         | TAA       | 87                    |
| trnW(uca) | J      | TCA        | 1621  | 1688 | 68     |             |           | -2                    |
| trnC(gca) | N      | GCA        | 1681  | 1746 | 66     |             |           | -8                    |
| trnY(gua) | N      | GTA        | 1759  | 1822 | 64     |             |           | 12                    |
| COX1      | J      |            | 1828  | 3363 | 1536   | CGA         | TAA       | 5                     |
| trnL(uaa) | J      | TAA        | 3359  | 3425 | 67     |             |           | -5                    |
| COX2      | J      |            | 3426  | 4142 | 717    | ATG         | TAA       | 0                     |
| trnK(cuu) | J      | CTT        | 4108  | 4178 | 71     |             |           | -35                   |
| trnD(guc) | J      | GTC        | 4189  | 4261 | 73     |             |           | 10                    |
| ATP8      | J      |            | 4262  | 4423 | 162    | ATT         | TAA       | 0                     |
| ATP6      | J      |            | 4417  | 5094 | 678    | ATG         | TAA       | -7                    |
| COX3      | J      |            | 5094  | 5882 | 789    | ATG         | TAA       | -1                    |
| trnG(ucc) | J      | TCC        | 5885  | 5951 | 67     |             |           | 2                     |
| ND3       | J      |            | 5952  | 6305 | 354    | ATT         | TAA       | 0                     |
| trnA(ugc) | J      | TGC        | 6324  | 6388 | 65     |             |           | 18                    |
| trnR(ucg) | J      | TCG        | 6389  | 6452 | 64     |             |           | 0                     |
| trnN(guu) | J      | GTT        | 6453  | 6518 | 66     |             |           | 0                     |

|           |   |     |       |       |      |     |     |     |
|-----------|---|-----|-------|-------|------|-----|-----|-----|
| trnS(gcu) | J | GCT | 6520  | 6585  | 66   |     |     | 1   |
| trnE(uuc) | J | TTC | 6596  | 6662  | 67   |     |     | 10  |
| trnF(gaa) | N | GTT | 6667  | 6732  | 66   |     |     | 4   |
| ND5       | N |     | 6713  | 8470  | 1758 | ATT | TAG | -20 |
| trnH(gug) | N | GTG | 8471  | 8536  | 66   |     |     | 0   |
| ND4       | N |     | 8545  | 9885  | 1341 | GTG | TAA | 8   |
| ND4L      | N |     | 9894  | 10175 | 282  | ATG | TAA | 8   |
| trnT(ugu) | J | TGT | 10178 | 10241 | 64   |     |     | 2   |
| trnP(ugg) | N | TGG | 10242 | 10306 | 65   |     |     | 0   |
| ND6       | J |     | 10309 | 10839 | 531  | ATC | TAA | 2   |
| CYTB      | J |     | 10843 | 11991 | 1149 | ATG | TAA | 3   |
| trnS(uga) | J | TGA | 11997 | 12065 | 69   |     |     | 5   |
| ND1       | N |     | 12084 | 13022 | 939  | ATG | TAA | 18  |
| trnL(uag) | N | TAG | 13023 | 13090 | 68   |     |     | 0   |
| l-rRNA    | N |     | 13070 | 14463 | 1394 |     |     | -21 |
| trnV(uac) | N | TAC | 14437 | 14503 | 67   |     |     | -27 |
| s-rRNA    | N |     | 14506 | 15324 | 819  |     |     | 2   |

**Table S1.16 Mitogenomic characteristics of *Phyllosphingia dissimilis***

| Gene      | Strand | Anti-codon | Start | Stop | Length | Start codon | End codon | Intergenic nucleotide |
|-----------|--------|------------|-------|------|--------|-------------|-----------|-----------------------|
| trnM(cau) | J      | CAT        | 319   | 385  | 67     |             |           | 0                     |
| trnI(gau) | J      | GAT        | 386   | 450  | 65     |             |           | 0                     |
| trnQ(uug) | N      | TTG        | 448   | 516  | 69     |             |           | -3                    |
| ND2       | J      |            | 570   | 1583 | 1014   | ATT         | TAA       | 53                    |
| trnW(uca) | J      | TCA        | 1582  | 1650 | 69     |             |           | -2                    |
| trnC(gca) | N      | GCA        | 1643  | 1706 | 64     |             |           | -8                    |
| trnY(gua) | N      | GTA        | 1708  | 1773 | 66     |             |           | 1                     |
| COX1      | J      |            | 1771  | 3315 | 1545   | ATT         | TAA       | -3                    |
| trnL(uaa) | J      | TAA        | 3311  | 3378 | 68     |             |           | -5                    |
| COX2      | J      |            | 3379  | 4060 | 682    | ATG         | T         | 0                     |
| trnK(cuu) | J      | CTT        | 4061  | 4131 | 71     |             |           | 0                     |
| trnD(guc) | J      | GTC        | 4144  | 4208 | 65     |             |           | 12                    |
| ATP8      | J      |            | 4209  | 4370 | 162    | ATT         | TAA       | 0                     |
| ATP6      | J      |            | 4364  | 5041 | 678    | ATG         | TAA       | -7                    |
| COX3      | J      |            | 5041  | 5832 | 792    | ATG         | TAA       | -1                    |
| trnG(ucc) | J      | TCC        | 5839  | 5905 | 67     |             |           | 6                     |
| ND3       | J      |            | 5906  | 6259 | 354    | ATC         | TAA       | 0                     |
| trnA(ugc) | J      | TGC        | 6263  | 6328 | 66     |             |           | 3                     |
| trnR(ucg) | J      | TCG        | 6329  | 6394 | 66     |             |           | 0                     |
| trnN(guu) | J      | GTT        | 6395  | 6460 | 66     |             |           | 0                     |

|           |   |     |       |       |      |     |     |     |
|-----------|---|-----|-------|-------|------|-----|-----|-----|
| trnS(gcu) | J | GCT | 6461  | 6526  | 66   |     |     | 0   |
| trnE(uuc) | J | TTC | 6527  | 6592  | 66   |     |     | 0   |
| trnF(gaa) | N | GAA | 6596  | 6664  | 69   |     |     | 3   |
| ND5       | N |     | 6642  | 8387  | 1746 | ATT | TAG | -23 |
| trnH(gug) | N | GTG | 8400  | 8467  | 68   |     |     | 12  |
| ND4       | N |     | 8487  | 9824  | 1338 | ATG | TAA | 19  |
| ND4L      | N |     | 9836  | 10126 | 291  | ATG | TAA | 11  |
| trnT(ugu) | J | TGT | 10132 | 10195 | 64   |     |     | 5   |
| trnP(ugg) | N | TGG | 10195 | 10260 | 66   |     |     | -1  |
| ND6       | J |     | 10272 | 10802 | 531  | ATG | TAA | 11  |
| CYTB      | J |     | 10802 | 11950 | 1149 | ATG | TAA | -1  |
| trnS(uga) | J | TGA | 11956 | 12028 | 73   |     |     | 5   |
| ND1       | N |     | 12036 | 12983 | 948  | ATG | TAG | 7   |
| trnL(uag) | N | TAG | 12984 | 13050 | 67   |     |     | 0   |
| l-rRNA    | N |     | 13030 | 14401 | 1372 |     |     | -21 |
| trnV(uac) | N | TAC | 14403 | 14468 | 66   |     |     | 1   |
| s-rRNA    | N |     | 14469 | 15245 | 777  |     |     | 0   |



**Table S1.17 Mitogenomic characteristics of *Hyalinetta circumflexa***

| Gene      | Strand | Anti-codon | Start | Stop | Length | Start codon | End codon | Intergenic nucleotide |
|-----------|--------|------------|-------|------|--------|-------------|-----------|-----------------------|
| trnM(cau) | J      | CAT        | 378   | 446  | 69     |             |           | 0                     |
| trnI(gau) | J      | GAT        | 449   | 512  | 64     |             |           | 2                     |
| trnQ(uug) | N      | TTG        | 510   | 578  | 69     |             |           | -3                    |
| ND2       | J      |            | 646   | 1659 | 1014   | ATT         | TAA       | 67                    |
| trnW(uca) | J      | TCA        | 1662  | 1732 | 71     |             |           | 2                     |
| trnC(gca) | N      | GCA        | 1725  | 1788 | 64     |             |           | -8                    |
| trnY(gua) | N      | GTA        | 1790  | 1856 | 67     |             |           | 1                     |
| COX1      | J      |            | 1871  | 3406 | 1536   | CGA         | TAA       | 14                    |
| trnL(uaa) | J      | TAA        | 3402  | 3470 | 69     |             |           | -5                    |
| COX2      | J      |            | 3471  | 4152 | 682    | ATG         | T         | 0                     |
| trnK(cuu) | J      | CTT        | 4153  | 4223 | 71     |             |           | 0                     |
| trnD(guc) | J      | GTC        | 4236  | 4304 | 69     |             |           | 12                    |
| ATP8      | J      |            | 4305  | 4475 | 171    | ATT         | TAA       | 0                     |
| ATP6      | J      |            | 4469  | 5146 | 678    | ATG         | TAA       | -7                    |
| COX3      | J      |            | 5159  | 5950 | 792    | ATG         | TAA       | 12                    |
| trnG(ucc) | J      | TCC        | 6031  | 6097 | 67     |             |           | 80                    |
| ND3       | J      |            | 6098  | 6451 | 354    | ATT         | TAA       | 0                     |
| trnA(ugc) | J      | TGC        | 6460  | 6526 | 67     |             |           | 8                     |
| trnR(ucg) | J      | TCG        | 6531  | 6595 | 65     |             |           | 4                     |
| trnN(guu) | J      | GTT        | 6596  | 6661 | 66     |             |           | 0                     |

|           |   |     |       |       |      |     |     |     |
|-----------|---|-----|-------|-------|------|-----|-----|-----|
| trnS(gcu) | J | GCT | 6679  | 6744  | 66   |     |     | 17  |
| trnE(uuc) | J | TTC | 6844  | 6913  | 70   |     |     | 99  |
| trnF(gaa) | N | GTT | 6927  | 6996  | 70   |     |     | 13  |
| ND5       | N |     | 6980  | 8722  | 1743 | ATC | TAA | -17 |
| trnH(gug) | N | GTG | 8735  | 8802  | 68   |     |     | 12  |
| ND4       | N |     | 8805  | 10142 | 1338 | ATG | TAA | 2   |
| ND4L      | N |     | 10152 | 10442 | 291  | ATG | TAA | 9   |
| trnT(ugu) | J | TGT | 10447 | 10512 | 66   |     |     | 4   |
| trnP(ugg) | N | TGG | 10512 | 10576 | 65   |     |     | -1  |
| ND6       | J |     | 10587 | 11123 | 537  | ATG | TAA | 10  |
| CYTB      | J |     | 11123 | 12277 | 1155 | ATG | TAA | -1  |
| trnS(uga) | J | TGA | 12276 | 12344 | 69   |     |     | -2  |
| ND1       | N |     | 12368 | 13303 | 936  | ATG | TAA | 23  |
| trnL(uag) | N | TAG | 13304 | 13374 | 71   |     |     | 0   |
| l-rRNA    | N |     | 13354 | 14726 | 1373 |     |     | -21 |
| trnV(uac) | N | TAC | 14727 | 14792 | 66   |     |     | 0   |
| s-rRNA    | N |     | 14792 | 15576 | 785  |     |     | -1  |

**Table S2.1 The nucleotide composition of PCGs in *Gazalina chrysolopha***

| Regions            | Strand | Size (bp) | T(U) | C    | A    | G    | AT(%) | GC(%) | GT(%) | AT skew | GC skew |
|--------------------|--------|-----------|------|------|------|------|-------|-------|-------|---------|---------|
| PCGs               | +      | 6924      | 38.4 | 17.8 | 33.8 | 10.1 | 72.2  | 27.9  | 48.5  | -0.064  | -0.278  |
| PCGs               | -      | 4326      | 47.3 | 7.2  | 28.5 | 17.1 | 75.8  | 24.3  | 64.4  | -0.248  | 0.409   |
| 1st codon position | +      | 2308      | 31.3 | 15.7 | 37.2 | 15.8 | 68.5  | 31.5  | 47.1  | 0.087   | 0.001   |
| 1st codon position | -      | 1442      | 40.3 | 6.7  | 33.4 | 19.6 | 73.7  | 26.3  | 59.9  | -0.094  | 0.489   |
| 2nd codon position | +      | 2308      | 45.9 | 19.4 | 22.5 | 12.2 | 68.4  | 31.6  | 58.1  | -0.342  | -0.228  |
| 2nd codon position | -      | 1442      | 51.1 | 12.2 | 21.1 | 15.6 | 72.2  | 27.8  | 66.7  | -0.416  | 0.122   |
| 3rd codon position | +      | 2308      | 37.9 | 18.3 | 41.6 | 2.3  | 79.5  | 20.6  | 40.2  | 0.046   | -0.781  |
| 3rd codon position | -      | 1442      | 50.4 | 2.6  | 31   | 16   | 81.4  | 18.6  | 66.4  | -0.239  | 0.724   |
| atp6               | +      | 678       | 38.8 | 18.1 | 34.5 | 8.6  | 73.3  | 26.7  | 47.4  | -0.058  | -0.359  |
| atp8               | +      | 165       | 43   | 15.2 | 39.4 | 2.4  | 82.4  | 17.6  | 45.4  | -0.044  | -0.724  |
| cox1               | +      | 1536      | 36.1 | 19.1 | 30.6 | 14.3 | 66.7  | 33.4  | 50.4  | -0.082  | -0.145  |
| cox2               | +      | 702       | 34.8 | 18.4 | 36.2 | 10.7 | 71    | 29.1  | 45.5  | 0.02    | -0.265  |
| cox3               | +      | 789       | 35.1 | 19.9 | 33   | 12   | 68.1  | 31.9  | 47.1  | -0.032  | -0.246  |
| cytb               | +      | 1152      | 37.8 | 18.4 | 33   | 10.8 | 70.8  | 29.2  | 48.6  | -0.069  | -0.262  |
| nad1               | -      | 936       | 47   | 8.1  | 25   | 19.9 | 72    | 28    | 66.9  | -0.306  | 0.42    |
| nad2               | +      | 1014      | 44   | 14   | 35.4 | 6.6  | 79.4  | 20.6  | 50.6  | -0.108  | -0.359  |
| nad3               | +      | 354       | 42.1 | 16.9 | 34.2 | 6.8  | 76.3  | 23.7  | 48.9  | -0.104  | -0.429  |
| nad4               | -      | 1340      | 47.8 | 7    | 29.4 | 15.8 | 77.2  | 22.8  | 63.6  | -0.238  | 0.386   |
| nad4L              | -      | 291       | 52.9 | 4.1  | 25.1 | 17.9 | 78    | 22    | 70.8  | -0.357  | 0.625   |
| nad5               | -      | 1761      | 46.1 | 7.3  | 30.2 | 16.4 | 76.3  | 23.7  | 62.5  | -0.208  | 0.386   |

|             |   |       |      |      |      |      |      |      |      |        |        |
|-------------|---|-------|------|------|------|------|------|------|------|--------|--------|
| nad6        | + | 534   | 40.4 | 17.2 | 36.5 | 5.8  | 76.9 | 23   | 46.2 | -0.051 | -0.496 |
| rrnL        | - | 1354  | 40.8 | 4.9  | 39.6 | 14.8 | 80.4 | 19.7 | 55.6 | -0.015 | 0.504  |
| rrnS        | - | 816   | 39.7 | 4.8  | 44.2 | 11.3 | 83.9 | 16.1 | 51   | 0.054  | 0.405  |
| rRNAs       | - | 2170  | 40.4 | 4.8  | 41.3 | 13.5 | 81.7 | 18.3 | 53.9 | 0.012  | 0.471  |
| tRNAs       | + | 942   | 38.7 | 9.6  | 42.7 | 9    | 81.4 | 18.6 | 47.7 | 0.048  | -0.029 |
| tRNAs       | - | 537   | 38.9 | 6.1  | 40.8 | 14.2 | 79.7 | 20.3 | 53.1 | 0.023  | 0.394  |
| Full genome | + | 15474 | 36.4 | 16.1 | 39.6 | 8    | 76   | 24.1 | 44.4 | 0.043  | -0.335 |

PCGs: protein-coding genes; +: major strand; -: minus strand

**Table S2.2 The nucleotide composition of PCGs in *Derocha hyalina***

| Regions            | Strand | Size (bp) | T(U) | C    | A    | G    | AT(%) | GC(%) | GT(%) | AT skew | GC skew |
|--------------------|--------|-----------|------|------|------|------|-------|-------|-------|---------|---------|
| PCGs               | +      | 6927      | 43.8 | 11.6 | 34.8 | 9.8  | 78.6  | 21.4  | 53.6  | -0.114  | -0.087  |
| PCGs               | -      | 4323      | 47.6 | 6.9  | 34.4 | 11   | 82    | 17.9  | 58.6  | -0.16   | 0.229   |
| 1st codon position | +      | 2309      | 35.2 | 11.7 | 37.6 | 15.5 | 72.8  | 27.2  | 50.7  | 0.034   | 0.137   |
| 1st codon position | -      | 1441      | 40.7 | 6.2  | 37.8 | 15.4 | 78.5  | 21.6  | 56.1  | -0.037  | 0.428   |
| 2nd codon position | +      | 2309      | 46.6 | 18.3 | 23   | 12.1 | 69.6  | 30.4  | 58.7  | -0.338  | -0.204  |
| 2nd codon position | -      | 1441      | 51.5 | 12.5 | 22   | 14   | 73.5  | 26.5  | 65.5  | -0.401  | 0.058   |
| 3rd codon position | +      | 2309      | 49.6 | 4.9  | 43.8 | 1.7  | 93.4  | 6.6   | 51.3  | -0.063  | -0.474  |
| 3rd codon position | -      | 1441      | 50.7 | 2.1  | 43.6 | 3.7  | 94.3  | 5.8   | 54.4  | -0.075  | 0.277   |
| atp6               | +      | 678       | 45   | 11.8 | 35.3 | 8    | 80.3  | 19.8  | 53    | -0.121  | -0.194  |
| atp8               | +      | 165       | 46.7 | 4.8  | 45.5 | 3    | 92.2  | 7.8   | 49.7  | -0.013  | -0.231  |
| cox1               | +      | 1539      | 41.8 | 13.3 | 30.9 | 14   | 72.7  | 27.3  | 55.8  | -0.15   | 0.026   |
| cox2               | +      | 717       | 39.9 | 13   | 36.8 | 10.3 | 76.7  | 23.3  | 50.2  | -0.04   | -0.114  |
| cox3               | +      | 792       | 41.5 | 12.8 | 33.1 | 12.6 | 74.6  | 25.4  | 54.1  | -0.113  | -0.005  |
| cytb               | +      | 1149      | 42.3 | 12.6 | 34.9 | 10.2 | 77.2  | 22.8  | 52.5  | -0.096  | -0.107  |
| nad1               | -      | 936       | 47.8 | 7.6  | 31.3 | 13.4 | 79.1  | 21    | 61.2  | -0.208  | 0.276   |
| nad2               | +      | 1005      | 48.9 | 9.7  | 35.7 | 5.8  | 84.6  | 15.5  | 54.7  | -0.155  | -0.252  |
| nad3               | +      | 354       | 48.6 | 9    | 35.3 | 7.1  | 83.9  | 16.1  | 55.7  | -0.158  | -0.123  |
| nad4               | -      | 1340      | 47.6 | 7.1  | 34.3 | 11   | 81.9  | 18.1  | 58.6  | -0.163  | 0.218   |
| nad4L              | -      | 291       | 50.5 | 3.4  | 36.4 | 9.6  | 86.9  | 13    | 60.1  | -0.162  | 0.474   |
| nad5               | -      | 1758      | 47   | 7    | 35.9 | 10   | 82.9  | 17    | 57    | -0.134  | 0.177   |

|             |   |       |      |      |      |      |      |      |      |        |        |
|-------------|---|-------|------|------|------|------|------|------|------|--------|--------|
| nad6        | + | 528   | 46.2 | 8.5  | 40   | 5.3  | 86.2 | 13.8 | 51.5 | -0.073 | -0.233 |
| rrnL        | - | 1391  | 41.4 | 4.9  | 44.3 | 9.4  | 85.7 | 14.3 | 50.8 | 0.034  | 0.317  |
| rrnS        | - | 783   | 41.6 | 5.1  | 44.2 | 9.1  | 85.8 | 14.2 | 50.7 | 0.03   | 0.279  |
| rRNAs       | - | 2174  | 41.5 | 5    | 44.3 | 9.3  | 85.8 | 14.3 | 50.8 | 0.032  | 0.303  |
| tRNAs       | + | 924   | 38.7 | 9.2  | 41.9 | 10.2 | 80.6 | 19.4 | 48.9 | 0.039  | 0.05   |
| tRNAs       | - | 537   | 39.1 | 5.4  | 43.8 | 11.7 | 82.9 | 17.1 | 50.8 | 0.056  | 0.37   |
| Full genome | + | 15332 | 41.2 | 10.7 | 40.2 | 7.9  | 81.4 | 18.6 | 49.1 | -0.012 | -0.153 |

**Table S2.3 The nucleotide composition of PCGs in *Phyllosphingia dissimilis***

| Regions            | Strand | Size (bp) | T(U) | C    | A    | G    | AT(%) | GC(%) | GT(%) | AT skew | GC skew |
|--------------------|--------|-----------|------|------|------|------|-------|-------|-------|---------|---------|
| PCGs               | +      | 6906      | 44.4 | 11.2 | 35.2 | 9.3  | 79.6  | 20.5  | 53.7  | -0.116  | -0.096  |
| PCGs               | -      | 4323      | 49.5 | 6    | 32.9 | 11.6 | 82.4  | 17.6  | 61.1  | -0.202  | 0.316   |
| 1st codon position | +      | 2302      | 36.1 | 11.5 | 37.2 | 15.3 | 73.3  | 26.8  | 51.4  | 0.015   | 0.143   |
| 1st codon position | -      | 1441      | 42.1 | 5.9  | 35.9 | 16.2 | 78    | 22.1  | 58.3  | -0.079  | 0.465   |
| 2nd codon position | +      | 2302      | 46.5 | 18.2 | 23.3 | 11.9 | 69.8  | 30.1  | 58.4  | -0.332  | -0.207  |
| 2nd codon position | -      | 1441      | 51.8 | 11.9 | 21.9 | 14.4 | 73.7  | 26.3  | 66.2  | -0.407  | 0.098   |
| 3rd codon position | +      | 2302      | 50.5 | 4    | 45   | 0.5  | 95.5  | 4.5   | 51    | -0.058  | -0.769  |
| 3rd codon position | -      | 1441      | 54.8 | 0.3  | 40.9 | 4.1  | 95.7  | 4.4   | 58.9  | -0.145  | 0.873   |
| atp6               | +      | 678       | 45.9 | 10.6 | 35.8 | 7.7  | 81.7  | 18.3  | 53.6  | -0.123  | -0.161  |
| atp8               | +      | 162       | 48.8 | 4.9  | 43.8 | 2.5  | 92.6  | 7.4   | 51.3  | -0.053  | -0.333  |
| cox1               | +      | 1545      | 40.2 | 14.5 | 32.2 | 13.1 | 72.4  | 27.6  | 53.3  | -0.11   | -0.052  |
| cox2               | +      | 682       | 42.1 | 11.1 | 36.7 | 10.1 | 78.8  | 21.2  | 52.2  | -0.069  | -0.048  |
| cox3               | +      | 792       | 42.2 | 12.2 | 33.2 | 12.4 | 75.4  | 24.6  | 54.6  | -0.119  | 0.005   |
| cytb               | +      | 1149      | 43.5 | 11.7 | 35.1 | 9.7  | 78.6  | 21.4  | 53.2  | -0.107  | -0.089  |
| nad1               | -      | 948       | 49.5 | 7    | 30.6 | 13   | 80.1  | 20    | 62.5  | -0.236  | 0.302   |
| nad2               | +      | 1014      | 49.6 | 9    | 35.8 | 5.6  | 85.4  | 14.6  | 55.2  | -0.162  | -0.23   |
| nad3               | +      | 354       | 48.6 | 9.6  | 35.6 | 6.2  | 84.2  | 15.8  | 54.8  | -0.154  | -0.214  |
| nad4               | -      | 1338      | 48.7 | 6.1  | 33.6 | 11.6 | 82.3  | 17.7  | 60.3  | -0.183  | 0.314   |
| nad4L              | -      | 291       | 53.3 | 3.8  | 33   | 10   | 86.3  | 13.8  | 63.3  | -0.235  | 0.45    |
| nad5               | -      | 1746      | 49.6 | 5.8  | 33.5 | 11.1 | 83.1  | 16.9  | 60.7  | -0.194  | 0.308   |

|             |   |       |      |      |      |      |      |      |      |        |        |
|-------------|---|-------|------|------|------|------|------|------|------|--------|--------|
| nad6        | + | 531   | 48.6 | 7.3  | 39.7 | 4.3  | 88.3 | 11.6 | 52.9 | -0.1   | -0.258 |
| rrnL        | - | 1372  | 41.7 | 5.1  | 42.9 | 10.3 | 84.6 | 15.4 | 52   | 0.014  | 0.34   |
| rrnS        | - | 777   | 42.5 | 4.5  | 43.1 | 9.9  | 85.6 | 14.4 | 52.4 | 0.008  | 0.375  |
| rRNAs       | - | 2149  | 42   | 4.9  | 43   | 10.2 | 85   | 15.1 | 52.2 | 0.012  | 0.352  |
| tRNAs       | + | 939   | 39.3 | 9.4  | 41.6 | 9.7  | 80.9 | 19.1 | 49   | 0.029  | 0.017  |
| tRNAs       | - | 535   | 42.1 | 4.9  | 40.2 | 12.9 | 82.3 | 17.8 | 55   | -0.023 | 0.453  |
| Full genome | + | 15260 | 40.7 | 10.9 | 41   | 7.4  | 81.7 | 18.3 | 48.1 | 0.005  | -0.191 |



**Table S2.4 The nucleotide composition of PCGs in *Menophra sp.***

| Regions            | Strand | Size (bp) | T(U) | C    | A    | G    | AT(%) | GC(%) | GT(%) | AT skew | GC skew |
|--------------------|--------|-----------|------|------|------|------|-------|-------|-------|---------|---------|
| PCGs               | +      | 6918      | 43.5 | 11.7 | 35   | 9.8  | 78.5  | 21.5  | 53.3  | -0.108  | -0.09   |
| PCGs               | -      | 4320      | 49   | 6.4  | 31.9 | 12.6 | 80.9  | 19    | 61.6  | -0.211  | 0.324   |
| 1st codon position | +      | 2306      | 35.3 | 11.4 | 37   | 16.3 | 72.3  | 27.7  | 51.6  | 0.023   | 0.177   |
| 1st codon position | -      | 1440      | 43.1 | 5.8  | 34.4 | 16.7 | 77.5  | 22.5  | 59.8  | -0.111  | 0.488   |
| 2nd codon position | +      | 2306      | 46.4 | 18.2 | 23.2 | 12.2 | 69.6  | 30.4  | 58.6  | -0.334  | -0.197  |
| 2nd codon position | -      | 1440      | 51.2 | 12.4 | 21.7 | 14.6 | 72.9  | 27    | 65.8  | -0.404  | 0.08    |
| 3rd codon position | +      | 2306      | 48.7 | 5.6  | 44.8 | 0.9  | 93.5  | 6.5   | 49.6  | -0.042  | -0.722  |
| 3rd codon position | -      | 1440      | 52.8 | 1.1  | 39.6 | 6.5  | 92.4  | 7.6   | 59.3  | -0.143  | 0.709   |
| atp6               | +      | 678       | 45.4 | 12.2 | 33.6 | 8.7  | 79    | 20.9  | 54.1  | -0.149  | -0.169  |
| atp8               | +      | 165       | 44.8 | 5.5  | 47.9 | 1.8  | 92.7  | 7.3   | 46.6  | 0.033   | -0.5    |
| cox1               | +      | 1536      | 41.1 | 13.9 | 31.3 | 13.7 | 72.4  | 27.6  | 54.8  | -0.136  | -0.007  |
| cox2               | +      | 702       | 40   | 11.7 | 37.3 | 11   | 77.3  | 22.7  | 51    | -0.035  | -0.031  |
| cox3               | +      | 789       | 41.1 | 13.1 | 32.7 | 13.2 | 73.8  | 26.3  | 54.3  | -0.113  | 0.005   |
| cytb               | +      | 1158      | 42.5 | 13.2 | 34.2 | 10.1 | 76.7  | 23.3  | 52.6  | -0.108  | -0.133  |
| nad1               | -      | 939       | 49.5 | 7.7  | 28.3 | 14.5 | 77.8  | 22.2  | 64    | -0.272  | 0.308   |
| nad2               | +      | 1002      | 48.8 | 8.3  | 37.1 | 5.8  | 85.9  | 14.1  | 54.6  | -0.136  | -0.177  |
| nad3               | +      | 354       | 44.6 | 11.3 | 37.6 | 6.5  | 82.2  | 17.8  | 51.1  | -0.086  | -0.27   |
| nad4               | -      | 1336      | 48.2 | 6.5  | 32.3 | 12.9 | 80.5  | 19.4  | 61.1  | -0.197  | 0.331   |
| nad4L              | -      | 291       | 53.6 | 3.4  | 32   | 11   | 85.6  | 14.4  | 64.6  | -0.253  | 0.524   |
| nad5               | -      | 1755      | 48.7 | 6.2  | 33.5 | 11.6 | 82.2  | 17.8  | 60.3  | -0.184  | 0.304   |

|             |   |       |      |      |      |      |      |      |      |        |        |
|-------------|---|-------|------|------|------|------|------|------|------|--------|--------|
| nad6        | + | 534   | 46.8 | 8.6  | 39.5 | 5.1  | 86.3 | 13.7 | 51.9 | -0.085 | -0.26  |
| rrnL        | - | 1412  | 42.8 | 5    | 42.2 | 10.1 | 85   | 15.1 | 52.9 | -0.007 | 0.34   |
| rrnS        | - | 790   | 42.2 | 4.9  | 43.3 | 9.6  | 85.5 | 14.5 | 51.8 | 0.013  | 0.322  |
| rRNAs       | - | 2202  | 42.6 | 5    | 42.6 | 9.9  | 85.2 | 14.9 | 52.5 | 0.001  | 0.333  |
| tRNAs       | + | 937   | 37.4 | 9.6  | 43.3 | 9.7  | 80.7 | 19.3 | 47.1 | 0.074  | 0.006  |
| tRNAs       | - | 536   | 41   | 5    | 42.2 | 11.8 | 83.2 | 16.8 | 52.8 | 0.013  | 0.4    |
| Full genome | + | 15250 | 39.9 | 11.4 | 41   | 7.8  | 80.9 | 19.2 | 47.7 | 0.013  | -0.189 |

**Table S2.5 The nucleotide composition of PCGs in *Numenes albofascia***

| Regions            | Strand | Size (bp) | T(U) | C    | A    | G    | AT(%) | GC(%) | GT(%) | AT skew | GC skew |
|--------------------|--------|-----------|------|------|------|------|-------|-------|-------|---------|---------|
| PCGs               | +      | 5187      | 40.8 | 15   | 33.9 | 10.3 | 74.7  | 25.3  | 51.1  | -0.092  | -0.187  |
| PCGs               | -      | 4311      | 48.1 | 6.6  | 30.4 | 15   | 78.5  | 21.6  | 63.1  | -0.226  | 0.39    |
| 1st codon position | +      | 1729      | 32.9 | 14.3 | 37   | 15.7 | 69.9  | 30    | 48.6  | 0.059   | 0.046   |
| 1st codon position | -      | 1437      | 41.8 | 6.1  | 33.7 | 18.5 | 75.5  | 24.6  | 60.3  | -0.107  | 0.507   |
| 2nd codon position | +      | 1729      | 45.5 | 19.2 | 22.5 | 12.8 | 68    | 32    | 58.3  | -0.338  | -0.199  |
| 2nd codon position | -      | 1437      | 51.8 | 12.1 | 20.7 | 15.4 | 72.5  | 27.5  | 67.2  | -0.43   | 0.119   |
| 3rd codon position | +      | 1729      | 44   | 11.5 | 42.3 | 2.3  | 86.3  | 13.8  | 46.3  | -0.02   | -0.671  |
| 3rd codon position | -      | 1437      | 50.7 | 1.5  | 36.7 | 11   | 87.4  | 12.5  | 61.7  | -0.16   | 0.756   |
| atp6               | +      | 678       | 40.7 | 15.9 | 35   | 8.4  | 75.7  | 24.3  | 49.1  | -0.076  | -0.309  |
| atp8               | +      | 162       | 46.3 | 11.1 | 40.7 | 1.9  | 87    | 13    | 48.2  | -0.064  | -0.714  |
| cox1               | +      | 1536      | 37.9 | 17   | 31.2 | 13.9 | 69.1  | 30.9  | 51.8  | -0.097  | -0.099  |
| cox2               | +      | 682       | 37.1 | 16   | 36.2 | 10.7 | 73.3  | 26.7  | 47.8  | -0.012  | -0.198  |
| cox3               | +      | 789       | 38.4 | 15.5 | 33.2 | 12.9 | 71.6  | 28.4  | 51.3  | -0.073  | -0.089  |
| nad1               | -      | 939       | 47.3 | 7.3  | 27.9 | 17.5 | 75.2  | 24.8  | 64.8  | -0.258  | 0.408   |
| nad2               | +      | 1014      | 47.4 | 11.1 | 35.4 | 6    | 82.8  | 17.1  | 53.4  | -0.145  | -0.299  |
| nad3               | +      | 327       | 45   | 14.4 | 33.6 | 7    | 78.6  | 21.4  | 52    | -0.144  | -0.343  |
| nad4               | -      | 1340      | 47.8 | 6.8  | 31.1 | 14.3 | 78.9  | 21.1  | 62.1  | -0.211  | 0.357   |
| nad4L              | -      | 291       | 52.9 | 3.4  | 29.2 | 14.4 | 82.1  | 17.8  | 67.3  | -0.289  | 0.615   |
| nad5               | -      | 1743      | 48   | 6.5  | 31.3 | 14.2 | 79.3  | 20.7  | 62.2  | -0.21   | 0.372   |
| rrnL               | -      | 1371      | 41.9 | 4.7  | 41.6 | 11.7 | 83.5  | 16.4  | 53.6  | -0.004  | 0.425   |

|             |        |           |      |      |      |      |       |       |       |         |         |
|-------------|--------|-----------|------|------|------|------|-------|-------|-------|---------|---------|
| rrnS        | -      | 850       | 40.7 | 4.5  | 44.7 | 10.1 | 85.4  | 14.6  | 50.8  | 0.047   | 0.387   |
| rRNAs       | -      | 2221      | 41.5 | 4.6  | 42.8 | 11.1 | 84.3  | 15.7  | 52.6  | 0.015   | 0.411   |
| tRNAs       | +      | 682       | 38.4 | 9.1  | 42.5 | 10   | 80.9  | 19.1  | 48.4  | 0.051   | 0.046   |
| tRNAs       | -      | 536       | 39.4 | 4.9  | 43.5 | 12.3 | 82.9  | 17.2  | 51.7  | 0.05    | 0.435   |
| Full genome | +      | 15756     | 38.6 | 13.5 | 40.3 | 7.6  | 78.9  | 21.1  | 46.2  | 0.021   | -0.281  |
| Regions     | Strand | Size (bp) | T(U) | C    | A    | G    | AT(%) | GC(%) | GT(%) | AT skew | GC skew |
| PCGs        | +      | 5187      | 40.8 | 15   | 33.9 | 10.3 | 74.7  | 25.3  | 51.1  | -0.092  | -0.187  |

**Table S2.6 The nucleotide composition of PCGs in *Rhagastis albomarginatus***

| Regions            | Strand | Size (bp) | T(U) | C    | A    | G    | AT(%) | GC(%) | GT(%) | AT skew | GC skew |
|--------------------|--------|-----------|------|------|------|------|-------|-------|-------|---------|---------|
| PCGs               | +      | 6891      | 42.5 | 12.4 | 35.6 | 9.5  | 78.1  | 21.9  | 52    | -0.088  | -0.13   |
| PCGs               | -      | 3159      | 48.2 | 6    | 33   | 12.8 | 81.2  | 18.8  | 61    | -0.188  | 0.366   |
| 1st codon position | +      | 2297      | 35.4 | 11.8 | 37.7 | 15.2 | 73.1  | 27    | 50.6  | 0.032   | 0.126   |
| 1st codon position | -      | 1053      | 42.2 | 6.4  | 35.4 | 16   | 77.6  | 22.4  | 58.2  | -0.087  | 0.432   |
| 2nd codon position | +      | 2297      | 46.1 | 18.6 | 23.2 | 12.1 | 69.3  | 30.7  | 58.2  | -0.332  | -0.214  |
| 2nd codon position | -      | 1053      | 51   | 10.8 | 22.7 | 15.5 | 73.7  | 26.3  | 66.5  | -0.384  | 0.177   |
| 3rd codon position | +      | 2297      | 45.9 | 6.7  | 46   | 1.4  | 91.9  | 8.1   | 47.3  | 0.001   | -0.658  |
| 3rd codon position | -      | 1053      | 51.6 | 0.7  | 40.8 | 6.9  | 92.4  | 7.6   | 58.5  | -0.116  | 0.825   |
| atp6               | +      | 675       | 43   | 13.6 | 35.7 | 7.7  | 78.7  | 21.3  | 50.7  | -0.092  | -0.278  |
| atp8               | +      | 162       | 45.7 | 9.3  | 43.2 | 1.9  | 88.9  | 11.2  | 47.6  | -0.028  | -0.667  |
| cox1               | +      | 1536      | 38.7 | 15.4 | 32.4 | 13.5 | 71.1  | 28.9  | 52.2  | -0.088  | -0.063  |
| cox2               | +      | 680       | 39.1 | 12.9 | 37.8 | 10.1 | 76.9  | 23    | 49.2  | -0.017  | -0.121  |
| cox3               | +      | 792       | 40.5 | 13   | 33.8 | 12.6 | 74.3  | 25.6  | 53.1  | -0.09   | -0.015  |
| cytb               | +      | 1149      | 42   | 13.2 | 34.7 | 10   | 76.7  | 23.2  | 52    | -0.095  | -0.139  |
| nad1               | -      | 936       | 47.6 | 7.5  | 30.3 | 14.5 | 77.9  | 22    | 62.1  | -0.222  | 0.32    |
| nad2               | +      | 1014      | 48.6 | 8.7  | 36.8 | 5.9  | 85.4  | 14.6  | 54.5  | -0.139  | -0.189  |
| nad3               | +      | 354       | 44.9 | 10.5 | 37.6 | 7.1  | 82.5  | 17.6  | 52    | -0.089  | -0.194  |
| nad4               | -      | 1332      | 48   | 6.6  | 33   | 12.5 | 81    | 19.1  | 60.5  | -0.186  | 0.307   |
| nad4L              | -      | 291       | 53.6 | 3.4  | 31.3 | 11.7 | 84.9  | 15.1  | 65.3  | -0.263  | 0.545   |
| nad5               | -      | 600*      | 47.2 | 3.3  | 38   | 11.5 | 85.2  | 14.8  | 58.7  | -0.108  | 0.551   |

|             |   |       |      |      |      |      |      |      |      |        |        |
|-------------|---|-------|------|------|------|------|------|------|------|--------|--------|
| nad6        | + | 531   | 46.7 | 7.9  | 40.7 | 4.7  | 87.4 | 12.6 | 51.4 | -0.069 | -0.254 |
| rrnL        | - | 1371  | 41.6 | 5    | 42.4 | 10.9 | 84   | 15.9 | 52.5 | 0.009  | 0.37   |
| rrnS        | - | 809   | 41.8 | 4.7  | 42.5 | 11   | 84.3 | 15.7 | 52.8 | 0.009  | 0.402  |
| rRNAs       | - | 2180  | 41.7 | 4.9  | 42.4 | 11   | 84.1 | 15.9 | 52.7 | 0.009  | 0.382  |
| tRNAs       | + | 957   | 39.5 | 9.3  | 41.8 | 9.4  | 81.3 | 18.7 | 48.9 | 0.028  | 0.006  |
| tRNAs       | - | 524   | 40.6 | 5.2  | 41.2 | 13   | 81.8 | 18.2 | 53.6 | 0.007  | 0.432  |
| Full genome | + | 14231 | 40.5 | 11.7 | 40.3 | 7.5  | 80.8 | 19.2 | 48   | -0.003 | -0.217 |

\*Note: The ND5 gene may need further validation.

**Table S2.7 The nucleotide composition of PCGs in *Zeuzera pyrina***

| Regions            | Strand | Size (bp) | T(U) | C    | A    | G    | AT(%) | GC(%) | GT(%) | AT skew | GC skew |
|--------------------|--------|-----------|------|------|------|------|-------|-------|-------|---------|---------|
| PCGs               | +      | 6930      | 42   | 14.3 | 33.6 | 10   | 75.6  | 24.3  | 52    | -0.111  | -0.177  |
| PCGs               | -      | 4320      | 47.9 | 6.7  | 30.9 | 14.4 | 78.8  | 21.1  | 62.3  | -0.216  | 0.363   |
| 1st codon position | +      | 2310      | 33.6 | 13.6 | 37   | 15.8 | 70.6  | 29.4  | 49.4  | 0.048   | 0.076   |
| 1st codon position | -      | 1440      | 41.9 | 6.2  | 33.7 | 18.1 | 75.6  | 24.3  | 60    | -0.109  | 0.487   |
| 2nd codon position | +      | 2310      | 46   | 19.3 | 22.3 | 12.5 | 68.3  | 31.8  | 58.5  | -0.347  | -0.214  |
| 2nd codon position | -      | 1440      | 51.7 | 12.4 | 20.2 | 15.6 | 71.9  | 28    | 67.3  | -0.438  | 0.114   |
| 3rd codon position | +      | 2310      | 46.5 | 10.1 | 41.6 | 1.7  | 88.1  | 11.8  | 48.2  | -0.056  | -0.708  |
| 3rd codon position | -      | 1440      | 50.1 | 1.5  | 38.8 | 9.5  | 88.9  | 11    | 59.6  | -0.127  | 0.723   |
| atp6               | +      | 678       | 43.2 | 15.2 | 32.4 | 9.1  | 75.6  | 24.3  | 52.3  | -0.142  | -0.248  |
| atp8               | +      | 162       | 50   | 6.2  | 42   | 1.9  | 92    | 8.1   | 51.9  | -0.087  | -0.538  |
| cox1               | +      | 1536      | 39.4 | 16.1 | 30.8 | 13.7 | 70.2  | 29.8  | 53.1  | -0.122  | -0.083  |
| cox2               | +      | 717       | 38.4 | 15.6 | 35.3 | 10.7 | 73.7  | 26.3  | 49.1  | -0.042  | -0.185  |
| cox3               | +      | 789       | 37.4 | 16.9 | 32.3 | 13.4 | 69.7  | 30.3  | 50.8  | -0.073  | -0.113  |
| cytb               | +      | 1149      | 41.3 | 14.5 | 34   | 10.1 | 75.3  | 24.6  | 51.4  | -0.097  | -0.18   |
| nad1               | -      | 939       | 46   | 7.8  | 29.3 | 16.9 | 75.3  | 24.7  | 62.9  | -0.222  | 0.371   |
| nad2               | +      | 1014      | 47.9 | 10.8 | 34.9 | 6.3  | 82.8  | 17.1  | 54.2  | -0.157  | -0.264  |
| nad3               | +      | 354       | 43.8 | 15.3 | 34.2 | 6.8  | 78    | 22.1  | 50.6  | -0.123  | -0.385  |
| nad4               | -      | 1341      | 47.4 | 6.9  | 31.5 | 14.2 | 78.9  | 21.1  | 61.6  | -0.202  | 0.343   |
| nad4L              | -      | 282       | 51.4 | 3.9  | 30.1 | 14.5 | 81.5  | 18.4  | 65.9  | -0.261  | 0.577   |
| nad5               | -      | 1758      | 48.8 | 6.5  | 31.5 | 13.3 | 80.3  | 19.8  | 62.1  | -0.216  | 0.343   |

|             |   |       |      |      |      |      |      |      |      |       |        |
|-------------|---|-------|------|------|------|------|------|------|------|-------|--------|
| nad6        | + | 531   | 46.7 | 10.5 | 36.7 | 6    | 83.4 | 16.5 | 52.7 | -0.12 | -0.273 |
| rrnL        | - | 1394  | 41.5 | 4.7  | 42.1 | 11.6 | 83.6 | 16.3 | 53.1 | 0.007 | 0.421  |
| rrnS        | - | 819   | 40.3 | 4.6  | 43.8 | 11.2 | 84.1 | 15.8 | 51.5 | 0.042 | 0.415  |
| rRNAs       | - | 2213  | 41.1 | 4.7  | 42.7 | 11.5 | 83.8 | 16.2 | 52.6 | 0.02  | 0.419  |
| tRNAs       | + | 940   | 40.3 | 9.5  | 41   | 9.3  | 81.3 | 18.8 | 49.6 | 0.008 | -0.011 |
| tRNAs       | - | 531   | 40.1 | 5.5  | 40.5 | 13.9 | 80.6 | 19.4 | 54   | 0.005 | 0.437  |
| Full genome | + | 15324 | 39.1 | 13.3 | 39.8 | 7.9  | 78.9 | 21.2 | 47   | 0.009 | -0.256 |



**Table S2.8 The nucleotide composition of PCGs in *Psyra falcipennis***

| Regions            | Strand | Size (bp) | T(U) | C    | A    | G    | AT(%) | GC(%) | GT(%) | AT skew | GC skew |
|--------------------|--------|-----------|------|------|------|------|-------|-------|-------|---------|---------|
| PCGs               | +      | 6912      | 42.6 | 11.5 | 35.8 | 10.1 | 78.4  | 21.6  | 52.7  | -0.087  | -0.067  |
| PCGs               | -      | 4302      | 49.5 | 6.5  | 31.5 | 12.5 | 81    | 19    | 62    | -0.222  | 0.315   |
| 1st codon position | +      | 2304      | 35.4 | 10.9 | 37.3 | 16.4 | 72.7  | 27.3  | 51.8  | 0.026   | 0.201   |
| 1st codon position | -      | 1434      | 41.8 | 5.9  | 35.4 | 16.9 | 77.2  | 22.8  | 58.7  | -0.084  | 0.48    |
| 2nd codon position | +      | 2304      | 45.9 | 18.4 | 23.3 | 12.4 | 69.2  | 30.8  | 58.3  | -0.327  | -0.195  |
| 2nd codon position | -      | 1434      | 51.1 | 12.6 | 21.6 | 14.7 | 72.7  | 27.3  | 65.8  | -0.406  | 0.079   |
| 3rd codon position | +      | 2304      | 46.5 | 5.3  | 46.8 | 1.5  | 93.3  | 6.8   | 48    | 0.003   | -0.561  |
| 3rd codon position | -      | 1434      | 55.6 | 1    | 37.7 | 5.8  | 93.3  | 6.8   | 61.4  | -0.192  | 0.711   |
| atp6               | +      | 678       | 42.3 | 12.7 | 36.3 | 8.7  | 78.6  | 21.4  | 51    | -0.077  | -0.186  |
| atp8               | +      | 165       | 45.5 | 6.1  | 45.5 | 3    | 91    | 9.1   | 48.5  | 0       | -0.333  |
| cox1               | +      | 1536      | 39.3 | 13.7 | 32.9 | 14.1 | 72.2  | 27.8  | 53.4  | -0.088  | 0.014   |
| cox2               | +      | 702       | 39.7 | 11.7 | 37.7 | 10.8 | 77.4  | 22.5  | 50.5  | -0.026  | -0.038  |
| cox3               | +      | 789       | 40.8 | 12.9 | 33.3 | 12.9 | 74.1  | 25.8  | 53.7  | -0.101  | 0       |
| cytb               | +      | 1152      | 41.9 | 12.4 | 35.5 | 10.2 | 77.4  | 22.6  | 52.1  | -0.083  | -0.1    |
| nad1               | -      | 936       | 49.7 | 7.7  | 28.1 | 14.5 | 77.8  | 22.2  | 64.2  | -0.277  | 0.308   |
| nad2               | +      | 1002      | 48.2 | 8.9  | 36.5 | 6.4  | 84.7  | 15.3  | 54.6  | -0.138  | -0.163  |
| nad3               | +      | 354       | 46.9 | 10.2 | 36.2 | 6.8  | 83.1  | 17    | 53.7  | -0.129  | -0.2    |
| nad4               | -      | 1336      | 49.6 | 6.4  | 32.1 | 11.8 | 81.7  | 18.2  | 61.4  | -0.214  | 0.295   |
| nad4L              | -      | 291       | 54   | 3.4  | 30.6 | 12   | 84.6  | 15.4  | 66    | -0.276  | 0.556   |
| nad5               | -      | 1742      | 48.6 | 6.4  | 33.1 | 11.9 | 81.7  | 18.3  | 60.5  | -0.19   | 0.302   |

|             |   |       |      |      |      |      |      |      |      |        |        |
|-------------|---|-------|------|------|------|------|------|------|------|--------|--------|
| nad6        | + | 534   | 46.1 | 7.1  | 40.6 | 6.2  | 86.7 | 13.3 | 52.3 | -0.063 | -0.07  |
| rrnL        | - | 1384  | 43.3 | 5.1  | 41.5 | 10   | 84.8 | 15.1 | 53.3 | -0.02  | 0.324  |
| rrnS        | - | 796   | 43.5 | 4.6  | 42.3 | 9.5  | 85.8 | 14.1 | 53   | -0.013 | 0.345  |
| rRNAs       | - | 2180  | 43.3 | 5    | 41.8 | 9.9  | 85.1 | 14.9 | 53.2 | -0.018 | 0.331  |
| tRNAs       | + | 936   | 37.7 | 9    | 43.9 | 9.4  | 81.6 | 18.4 | 47.1 | 0.076  | 0.023  |
| tRNAs       | - | 533   | 40.5 | 5.1  | 42.8 | 11.6 | 83.3 | 16.7 | 52.1 | 0.027  | 0.393  |
| Full genome | + | 15489 | 39.3 | 11.1 | 41.8 | 7.8  | 81.1 | 18.9 | 47.1 | 0.031  | -0.175 |

**Table S2.9 The nucleotide composition of PCGs in *Zaranga tukuringra***

| Regions            | Strand | Size (bp) | T(U) | C    | A    | G    | AT(%) | GC(%) | GT(%) | AT skew | GC skew |
|--------------------|--------|-----------|------|------|------|------|-------|-------|-------|---------|---------|
| PCGs               | +      | 6885      | 40.4 | 14.7 | 35   | 9.9  | 75.4  | 24.6  | 50.3  | -0.072  | -0.196  |
| PCGs               | -      | 4311      | 49.5 | 6.5  | 30.1 | 13.9 | 79.6  | 20.4  | 63.4  | -0.244  | 0.366   |
| 1st codon position | +      | 2295      | 32.3 | 14.2 | 37.7 | 15.8 | 70    | 30    | 48.1  | 0.077   | 0.054   |
| 1st codon position | -      | 1437      | 42.2 | 5.9  | 34.8 | 17.1 | 77    | 23    | 59.3  | -0.096  | 0.486   |
| 2nd codon position | +      | 2295      | 46.1 | 19.1 | 22.6 | 12.2 | 68.7  | 31.3  | 58.3  | -0.341  | -0.218  |
| 2nd codon position | -      | 1437      | 51.6 | 12.4 | 20.9 | 15.1 | 72.5  | 27.5  | 66.7  | -0.424  | 0.099   |
| 3rd codon position | +      | 2295      | 42.8 | 10.9 | 44.6 | 1.7  | 87.4  | 12.6  | 44.5  | 0.021   | -0.737  |
| 3rd codon position | -      | 1437      | 54.7 | 1.1  | 34.6 | 9.6  | 89.3  | 10.7  | 64.3  | -0.225  | 0.792   |
| atp6               | +      | 678       | 39.8 | 17.1 | 35.1 | 8    | 74.9  | 25.1  | 47.8  | -0.063  | -0.365  |
| atp8               | +      | 162       | 45.7 | 8    | 43.2 | 3.1  | 88.9  | 11.1  | 48.8  | -0.028  | -0.444  |
| cox1               | +      | 1536      | 38.6 | 16.6 | 30.7 | 14.1 | 69.3  | 30.7  | 52.7  | -0.114  | -0.083  |
| cox2               | +      | 682       | 38.6 | 14.4 | 36.8 | 10.3 | 75.4  | 24.7  | 48.9  | -0.023  | -0.167  |
| cox3               | +      | 789       | 36.2 | 16.5 | 34.1 | 13.2 | 70.3  | 29.7  | 49.4  | -0.031  | -0.111  |
| cytb               | +      | 1152      | 38.3 | 16.2 | 34.9 | 10.6 | 73.2  | 26.8  | 48.9  | -0.046  | -0.21   |
| nad1               | -      | 936       | 49.6 | 7.6  | 27.2 | 15.6 | 76.8  | 23.2  | 65.2  | -0.291  | 0.346   |
| nad2               | +      | 1002      | 46.7 | 11.5 | 35.9 | 5.9  | 82.6  | 17.4  | 52.6  | -0.13   | -0.322  |
| nad3               | +      | 354       | 44.1 | 14.7 | 34.7 | 6.5  | 78.8  | 21.2  | 50.6  | -0.118  | -0.387  |
| nad4               | -      | 1346      | 50   | 6    | 30.6 | 13.4 | 80.6  | 19.4  | 63.4  | -0.241  | 0.379   |
| nad4L              | -      | 288       | 53.1 | 4.2  | 29.5 | 13.2 | 82.6  | 17.4  | 66.3  | -0.286  | 0.52    |
| nad5               | -      | 1743      | 48.5 | 6.6  | 31.3 | 13.6 | 79.8  | 20.2  | 62.1  | -0.215  | 0.347   |

|             |   |       |      |      |      |      |      |      |      |        |        |
|-------------|---|-------|------|------|------|------|------|------|------|--------|--------|
| nad6        | + | 531   | 43.3 | 9.2  | 42   | 5.5  | 85.3 | 14.7 | 48.8 | -0.015 | -0.256 |
| rrnL        | - | 1373  | 42.2 | 4.9  | 39.9 | 13   | 82.1 | 17.9 | 55.2 | -0.028 | 0.455  |
| rrnS        | - | 808   | 42.8 | 4.8  | 42.7 | 9.7  | 85.5 | 14.5 | 52.5 | -0.001 | 0.333  |
| rRNAs       | - | 2181  | 42.4 | 4.9  | 40.9 | 11.8 | 83.3 | 16.7 | 54.2 | -0.018 | 0.416  |
| tRNAs       | + | 925   | 38.7 | 9.1  | 42.7 | 9.5  | 81.4 | 18.6 | 48.2 | 0.049  | 0.023  |
| tRNAs       | - | 537   | 40.6 | 5    | 39.5 | 14.9 | 80.1 | 19.9 | 55.5 | -0.014 | 0.495  |
| Full genome | + | 15330 | 37.5 | 13.4 | 41.2 | 7.8  | 78.7 | 21.2 | 45.3 | 0.047  | -0.265 |

**Table S2.10 The nucleotide composition of PCGs in *Paralebeda femorata***

| Regions            | Strand | Size (bp) | T(U) | C    | A    | G    | AT(%) | GC(%) | GT(%) | AT skew | GC skew |
|--------------------|--------|-----------|------|------|------|------|-------|-------|-------|---------|---------|
| PCGs               | +      | 6903      | 41.1 | 13.9 | 35.3 | 9.8  | 76.4  | 23.7  | 50.9  | -0.076  | -0.172  |
| PCGs               | -      | 4326      | 48.3 | 6.5  | 31.4 | 13.8 | 79.7  | 20.3  | 62.1  | -0.212  | 0.359   |
| 1st codon position | +      | 2301      | 33   | 12.9 | 38.4 | 15.7 | 71.4  | 28.6  | 48.7  | 0.075   | 0.099   |
| 1st codon position | -      | 1442      | 41.6 | 5.6  | 34   | 18.7 | 75.6  | 24.3  | 60.3  | -0.1    | 0.538   |
| 2nd codon position | +      | 2301      | 46.2 | 18.8 | 22.6 | 12.4 | 68.8  | 31.2  | 58.6  | -0.343  | -0.206  |
| 2nd codon position | -      | 1442      | 51   | 13   | 20.8 | 15.3 | 71.8  | 28.3  | 66.3  | -0.42   | 0.081   |
| 3rd codon position | +      | 2301      | 43.9 | 9.9  | 44.9 | 1.3  | 88.8  | 11.2  | 45.2  | 0.01    | -0.767  |
| 3rd codon position | -      | 1442      | 52.2 | 1    | 39.3 | 7.5  | 91.5  | 8.5   | 59.7  | -0.141  | 0.77    |
| atp6               | +      | 678       | 42.2 | 14.9 | 35.3 | 7.7  | 77.5  | 22.6  | 49.9  | -0.09   | -0.32   |
| atp8               | +      | 174       | 42   | 8.6  | 47.7 | 1.7  | 89.7  | 10.3  | 43.7  | 0.064   | -0.667  |
| cox1               | +      | 1539      | 39.7 | 15   | 31.3 | 14   | 71    | 29    | 53.7  | -0.119  | -0.034  |
| cox2               | +      | 682       | 38.1 | 14.5 | 36.5 | 10.9 | 74.6  | 25.4  | 49    | -0.022  | -0.145  |
| cox3               | +      | 789       | 38.8 | 15.2 | 33.5 | 12.5 | 72.3  | 27.7  | 51.3  | -0.074  | -0.096  |
| cytb               | +      | 1149      | 40.3 | 15.1 | 34.6 | 10.1 | 74.9  | 25.2  | 50.4  | -0.077  | -0.197  |
| nad1               | -      | 951       | 48.4 | 7.8  | 28.8 | 15   | 77.2  | 22.8  | 63.4  | -0.253  | 0.318   |
| nad2               | +      | 1014      | 46.5 | 10.1 | 37.1 | 6.3  | 83.6  | 16.4  | 52.8  | -0.113  | -0.229  |
| nad3               | +      | 351       | 43   | 14.5 | 36.2 | 6.3  | 79.2  | 20.8  | 49.3  | -0.086  | -0.397  |
| nad4               | -      | 1340      | 47.6 | 6.3  | 31.8 | 14.3 | 79.4  | 20.6  | 61.9  | -0.199  | 0.384   |
| nad4L              | -      | 294       | 53.1 | 3.7  | 28.6 | 14.6 | 81.7  | 18.3  | 67.7  | -0.3    | 0.593   |
| nad5               | -      | 1743      | 47.9 | 6.4  | 33   | 12.7 | 80.9  | 19.1  | 60.6  | -0.184  | 0.327   |

|             |   |       |      |      |      |      |      |      |      |        |        |
|-------------|---|-------|------|------|------|------|------|------|------|--------|--------|
| nad6        | + | 528   | 40.3 | 12.3 | 41.7 | 5.7  | 82   | 18   | 46   | 0.016  | -0.368 |
| rrnL        | - | 1372  | 43.6 | 4.7  | 40.7 | 11   | 84.3 | 15.7 | 54.6 | -0.035 | 0.398  |
| rrnS        | - | 797   | 42.4 | 4.6  | 43.4 | 9.5  | 85.8 | 14.1 | 51.9 | 0.012  | 0.345  |
| rRNAs       | - | 2169  | 43.2 | 4.7  | 41.7 | 10.5 | 84.9 | 15.2 | 53.7 | -0.017 | 0.38   |
| tRNAs       | + | 945   | 38.8 | 9.4  | 41.7 | 10.1 | 80.5 | 19.5 | 48.9 | 0.035  | 0.033  |
| tRNAs       | - | 533   | 41.1 | 5.1  | 39.2 | 14.6 | 80.3 | 19.7 | 55.7 | -0.023 | 0.486  |
| Full genome | + | 15376 | 38.5 | 12.9 | 40.9 | 7.8  | 79.4 | 20.7 | 46.3 | 0.03   | -0.247 |

**Table S2.11 The nucleotide composition of PCGs in *Sphragifera sigillata***

| Regions            | Strand | Size (bp) | T(U) | C    | A    | G    | AT(%) | GC(%) | GT(%) | AT skew | GC skew |
|--------------------|--------|-----------|------|------|------|------|-------|-------|-------|---------|---------|
| PCGs               | +      | 6900      | 44.7 | 11.6 | 34.1 | 9.7  | 78.8  | 21.3  | 54.4  | -0.135  | -0.089  |
| PCGs               | -      | 4305      | 48.8 | 6.2  | 33.5 | 11.5 | 82.3  | 17.7  | 60.3  | -0.185  | 0.294   |
| 1st codon position | +      | 2300      | 35.6 | 11.7 | 36.8 | 15.9 | 72.4  | 27.6  | 51.5  | 0.017   | 0.15    |
| 1st codon position | -      | 1435      | 41   | 5.9  | 36.7 | 16.4 | 77.7  | 22.3  | 57.4  | -0.056  | 0.47    |
| 2nd codon position | +      | 2300      | 46.3 | 18.7 | 22.6 | 12.5 | 68.9  | 31.2  | 58.8  | -0.345  | -0.198  |
| 2nd codon position | -      | 1435      | 51.6 | 12.3 | 21.1 | 15   | 72.7  | 27.3  | 66.6  | -0.42   | 0.1     |
| 3rd codon position | +      | 2300      | 52.3 | 4.3  | 42.8 | 0.7  | 95.1  | 5     | 53    | -0.099  | -0.735  |
| 3rd codon position | -      | 1435      | 53.7 | 0.6  | 42.8 | 2.9  | 96.5  | 3.5   | 56.6  | -0.113  | 0.68    |
| atp6               | +      | 678       | 44.8 | 13.4 | 33.8 | 8    | 78.6  | 21.4  | 52.8  | -0.141  | -0.255  |
| atp8               | +      | 162       | 46.3 | 6.8  | 44.4 | 2.5  | 90.7  | 9.3   | 48.8  | -0.02   | -0.467  |
| cox1               | +      | 1539      | 41.1 | 13.9 | 31.6 | 13.3 | 72.7  | 27.2  | 54.4  | -0.13   | -0.021  |
| cox2               | +      | 682       | 43.1 | 11.4 | 35.3 | 10.1 | 78.4  | 21.5  | 53.2  | -0.099  | -0.061  |
| cox3               | +      | 789       | 43.6 | 11.9 | 31.6 | 12.9 | 75.2  | 24.8  | 56.5  | -0.16   | 0.041   |
| cytb               | +      | 1149      | 43.3 | 12.2 | 34.3 | 10.2 | 77.6  | 22.4  | 53.5  | -0.117  | -0.089  |
| nad1               | -      | 939       | 49.3 | 7.5  | 30.8 | 12.5 | 80.1  | 20    | 61.8  | -0.231  | 0.251   |
| nad2               | +      | 1014      | 50.8 | 8.4  | 34.7 | 6.1  | 85.5  | 14.5  | 56.9  | -0.188  | -0.156  |
| nad3               | +      | 357       | 48.2 | 10.9 | 33.9 | 7    | 82.1  | 17.9  | 55.2  | -0.174  | -0.219  |
| nad4               | -      | 1340      | 48.3 | 6.2  | 34.2 | 11.3 | 82.5  | 17.5  | 59.6  | -0.171  | 0.294   |
| nad4L              | -      | 291       | 54.6 | 3.8  | 28.5 | 13.1 | 83.1  | 16.9  | 67.7  | -0.314  | 0.551   |
| nad5               | -      | 1737      | 47.9 | 6    | 35.3 | 10.7 | 83.2  | 16.7  | 58.6  | -0.151  | 0.278   |

|             |   |       |      |      |      |      |      |      |      |        |        |
|-------------|---|-------|------|------|------|------|------|------|------|--------|--------|
| nad6        | + | 531   | 47.3 | 8.5  | 38.8 | 5.5  | 86.1 | 14   | 52.8 | -0.098 | -0.216 |
| rrnL        | - | 973   | 39.6 | 6.2  | 43.9 | 10.4 | 83.5 | 16.6 | 50   | 0.052  | 0.255  |
| rrnS        | - | 840   | 42.4 | 4.9  | 43.8 | 8.9  | 86.2 | 13.8 | 51.3 | 0.017  | 0.293  |
| rRNAs       | - | 1813  | 40.9 | 5.6  | 43.8 | 9.7  | 84.7 | 15.3 | 50.6 | 0.035  | 0.271  |
| tRNAs       | + | 942   | 39.8 | 8.7  | 41.9 | 9.6  | 81.7 | 18.3 | 49.4 | 0.026  | 0.047  |
| tRNAs       | - | 536   | 39   | 5    | 44   | 11.9 | 83   | 16.9 | 50.9 | 0.061  | 0.407  |
| Full genome | + | 15377 | 41.3 | 10.8 | 40.3 | 7.6  | 81.6 | 18.4 | 48.9 | -0.013 | -0.176 |



**Table S2.12 The nucleotide composition of PCGs in *Lassaba albidaria***

| Regions            | Strand | Size (bp) | T(U) | C    | A    | G    | AT(%) | GC(%) | GT(%) | AT skew | GC skew |
|--------------------|--------|-----------|------|------|------|------|-------|-------|-------|---------|---------|
| PCGs               | +      | 6924      | 41.7 | 7.5  | 39.6 | 11.1 | 81.3  | 18.6  | 52.8  | -0.027  | 0.193   |
| PCGs               | -      | 4350      | 38.1 | 11.3 | 42.1 | 8.5  | 80.2  | 19.8  | 46.6  | 0.05    | -0.144  |
| 1st codon position | +      | 2308      | 40.9 | 5.7  | 43   | 10.4 | 83.9  | 16.1  | 51.3  | 0.026   | 0.29    |
| 1st codon position | -      | 1450      | 34.9 | 12.5 | 39.9 | 12.7 | 74.8  | 25.2  | 47.6  | 0.067   | 0.008   |
| 2nd codon position | +      | 2308      | 40.2 | 8.8  | 38.4 | 12.5 | 78.6  | 21.3  | 52.7  | -0.023  | 0.172   |
| 2nd codon position | -      | 1450      | 41.3 | 12.4 | 40.2 | 6.1  | 81.5  | 18.5  | 47.4  | -0.014  | -0.343  |
| 3rd codon position | +      | 2308      | 44.2 | 8.1  | 37.3 | 10.5 | 81.5  | 18.6  | 54.7  | -0.085  | 0.133   |
| 3rd codon position | -      | 1450      | 38.1 | 9    | 46.2 | 6.6  | 84.3  | 15.6  | 44.7  | 0.096   | -0.154  |
| atp6               | +      | 678       | 39.4 | 8.6  | 41.7 | 10.3 | 81.1  | 18.9  | 49.7  | 0.029   | 0.094   |
| atp8               | +      | 165       | 33.9 | 15.8 | 40   | 10.3 | 73.9  | 26.1  | 44.2  | 0.082   | -0.209  |
| cox1               | +      | 1545      | 44.9 | 7.7  | 34.4 | 13   | 79.3  | 20.7  | 57.9  | -0.133  | 0.256   |
| cox2               | +      | 702       | 37.9 | 7.8  | 42.7 | 11.5 | 80.6  | 19.3  | 49.4  | 0.06    | 0.191   |
| cox3               | +      | 789       | 45.1 | 5.1  | 40.9 | 8.9  | 86    | 14    | 54    | -0.049  | 0.273   |
| cytb               | +      | 1152      | 37.1 | 8.4  | 43.3 | 11.2 | 80.4  | 19.6  | 48.3  | 0.078   | 0.142   |
| nad1               | -      | 945       | 40.8 | 12.4 | 34.3 | 12.5 | 75.1  | 24.9  | 53.3  | -0.087  | 0.004   |
| nad2               | +      | 1002      | 43.5 | 3.6  | 42.6 | 10.3 | 86.1  | 13.9  | 53.8  | -0.01   | 0.482   |
| nad3               | +      | 357       | 52.1 | 6.4  | 31.7 | 9.8  | 83.8  | 16.2  | 61.9  | -0.244  | 0.207   |
| nad4               | -      | 1359      | 41.4 | 9.7  | 42   | 6.8  | 83.4  | 16.5  | 48.2  | 0.007   | -0.173  |
| nad4L              | -      | 291       | 41.6 | 13.7 | 33.3 | 11.3 | 74.9  | 25    | 52.9  | -0.11   | -0.096  |
| nad5               | -      | 1755      | 33.5 | 11.6 | 47.9 | 7.1  | 81.4  | 18.7  | 40.6  | 0.176   | -0.242  |

|             |   |       |      |      |      |      |      |      |      |        |        |
|-------------|---|-------|------|------|------|------|------|------|------|--------|--------|
| nad6        | + | 534   | 37.8 | 12.7 | 37.1 | 12.4 | 74.9 | 25.1 | 50.2 | -0.01  | -0.015 |
| rrnL        | - | 1379  | 43.1 | 10.8 | 36.3 | 9.8  | 79.4 | 20.6 | 52.9 | -0.087 | -0.049 |
| rrnS        | - | 811   | 43.6 | 8.4  | 41.9 | 6    | 85.5 | 14.4 | 49.6 | -0.02  | -0.162 |
| rRNAs       | - | 2190  | 43.3 | 9.9  | 38.4 | 8.4  | 81.7 | 18.3 | 51.7 | -0.061 | -0.082 |
| tRNAs       | + | 935   | 44   | 7.9  | 35.8 | 12.3 | 79.8 | 20.2 | 56.3 | -0.102 | 0.217  |
| tRNAs       | - | 538   | 42.9 | 9.3  | 39.6 | 8.2  | 82.5 | 17.5 | 51.1 | -0.041 | -0.064 |
| Full genome | + | 15351 | 41.4 | 7.8  | 39.8 | 10.9 | 81.2 | 18.7 | 52.3 | -0.02  | 0.165  |

**Table S2.13 The nucleotide composition of PCGs in *Asota tortuosa***

| Regions            | Strand | Size (bp) | T(U) | C    | A    | G    | AT(%) | GC(%) | GT(%) | AT skew | GC skew |
|--------------------|--------|-----------|------|------|------|------|-------|-------|-------|---------|---------|
| PCGs               | +      | 6897      | 43.8 | 12.6 | 34.1 | 9.5  | 77.9  | 22.1  | 53.3  | -0.124  | -0.138  |
| PCGs               | -      | 4308      | 47.6 | 6.2  | 33.3 | 12.9 | 80.9  | 19.1  | 60.5  | -0.177  | 0.35    |
| 1st codon position | +      | 2299      | 35.1 | 12.2 | 37   | 15.7 | 72.1  | 27.9  | 50.8  | 0.027   | 0.128   |
| 1st codon position | -      | 1436      | 39.9 | 6.1  | 37   | 17   | 76.9  | 23.1  | 56.9  | -0.037  | 0.474   |
| 2nd codon position | +      | 2299      | 46.2 | 18.8 | 22.8 | 12.2 | 69    | 31    | 58.4  | -0.339  | -0.212  |
| 2nd codon position | -      | 1436      | 51.3 | 11.9 | 21.7 | 15   | 73    | 26.9  | 66.3  | -0.405  | 0.116   |
| 3rd codon position | +      | 2299      | 50.1 | 6.7  | 42.6 | 0.6  | 92.7  | 7.3   | 50.7  | -0.081  | -0.844  |
| 3rd codon position | -      | 1436      | 51.6 | 0.6  | 41.2 | 6.6  | 92.8  | 7.2   | 58.2  | -0.113  | 0.827   |
| atp6               | +      | 678       | 45   | 12.8 | 33.8 | 8.4  | 78.8  | 21.2  | 53.4  | -0.142  | -0.208  |
| atp8               | +      | 165       | 43.6 | 7.3  | 45.5 | 3.6  | 89.1  | 10.9  | 47.2  | 0.02    | -0.333  |
| cox1               | +      | 1536      | 40.3 | 14.8 | 31.4 | 13.5 | 71.7  | 28.3  | 53.8  | -0.124  | -0.048  |
| cox2               | +      | 682       | 41.8 | 13   | 35.2 | 10   | 77    | 23    | 51.8  | -0.086  | -0.134  |
| cox3               | +      | 789       | 40.3 | 13.9 | 33.5 | 12.3 | 73.8  | 26.2  | 52.6  | -0.093  | -0.063  |
| cytb               | +      | 1158      | 42.8 | 13.6 | 33.7 | 9.9  | 76.5  | 23.5  | 52.7  | -0.12   | -0.154  |
| nad1               | -      | 936       | 47.2 | 7.5  | 30.3 | 15   | 77.5  | 22.5  | 62.2  | -0.218  | 0.333   |
| nad2               | +      | 1011      | 49.7 | 9.7  | 35.1 | 5.5  | 84.8  | 15.2  | 55.2  | -0.172  | -0.273  |
| nad3               | +      | 354       | 47.7 | 11   | 34.7 | 6.5  | 82.4  | 17.5  | 54.2  | -0.158  | -0.258  |
| nad4               | -      | 1340      | 47.2 | 5.9  | 33.7 | 13.1 | 80.9  | 19    | 60.3  | -0.167  | 0.38    |
| nad4L              | -      | 288       | 53.8 | 3.8  | 31.2 | 11.1 | 85    | 14.9  | 64.9  | -0.265  | 0.488   |
| nad5               | -      | 1746      | 47.1 | 6.1  | 34.9 | 11.9 | 82    | 18    | 59    | -0.148  | 0.318   |

|             |   |       |      |      |      |      |      |      |      |        |        |
|-------------|---|-------|------|------|------|------|------|------|------|--------|--------|
| nad6        | + | 525   | 48.6 | 8.8  | 37.5 | 5.1  | 86.1 | 13.9 | 53.7 | -0.128 | -0.26  |
| rrnL        | - | 1388  | 41   | 5    | 43.2 | 10.9 | 84.2 | 15.9 | 51.9 | 0.026  | 0.373  |
| rrnS        | - | 809   | 41.7 | 4.9  | 43.1 | 10.3 | 84.8 | 15.2 | 52   | 0.017  | 0.35   |
| rRNAs       | - | 2197  | 41.2 | 5    | 43.1 | 10.7 | 84.3 | 15.7 | 51.9 | 0.023  | 0.364  |
| tRNAs       | + | 926   | 39.2 | 9.6  | 41.1 | 10   | 80.3 | 19.6 | 49.2 | 0.024  | 0.022  |
| tRNAs       | - | 543   | 39   | 5.3  | 43.3 | 12.3 | 82.3 | 17.6 | 51.3 | 0.051  | 0.396  |
| Full genome | + | 15385 | 40.7 | 11.9 | 39.9 | 7.5  | 80.6 | 19.4 | 48.2 | -0.011 | -0.227 |

**Table S2.14 The nucleotide composition of PCGs in *Hyalinetta circumflexa***

| Regions            | Strand | Size (bp) | T(U) | C    | A    | G    | AT(%) | GC(%) | GT(%) | AT skew | GC skew |
|--------------------|--------|-----------|------|------|------|------|-------|-------|-------|---------|---------|
| PCGs               | +      | 6918      | 43.3 | 11.9 | 35.4 | 9.3  | 78.7  | 21.2  | 52.6  | -0.1    | -0.123  |
| PCGs               | -      | 4308      | 47.7 | 6.1  | 34.2 | 12   | 81.9  | 18.1  | 59.7  | -0.165  | 0.331   |
| 1st codon position | +      | 2306      | 35.7 | 11.7 | 37.4 | 15.2 | 73.1  | 26.9  | 50.9  | 0.023   | 0.13    |
| 1st codon position | -      | 1436      | 40.5 | 5.9  | 36.5 | 17.1 | 77    | 23    | 57.6  | -0.052  | 0.486   |
| 2nd codon position | +      | 2306      | 46.1 | 18.3 | 23.5 | 12.1 | 69.6  | 30.4  | 58.2  | -0.323  | -0.201  |
| 2nd codon position | -      | 1436      | 52.5 | 11.7 | 21.1 | 14.7 | 73.6  | 26.4  | 67.2  | -0.427  | 0.113   |
| 3rd codon position | +      | 2306      | 48.3 | 5.8  | 45.4 | 0.6  | 93.7  | 6.4   | 48.9  | -0.031  | -0.823  |
| 3rd codon position | -      | 1436      | 50.1 | 0.6  | 45   | 4.3  | 95.1  | 4.9   | 54.4  | -0.054  | 0.771   |
| atp6               | +      | 678       | 44   | 11.9 | 36.6 | 7.5  | 80.6  | 19.4  | 51.5  | -0.092  | -0.227  |
| atp8               | +      | 171       | 46.8 | 6.4  | 43.3 | 3.5  | 90.1  | 9.9   | 50.3  | -0.039  | -0.294  |
| cox1               | +      | 1536      | 40   | 14.3 | 32.6 | 13.2 | 72.6  | 27.5  | 53.2  | -0.101  | -0.04   |
| cox2               | +      | 682       | 41.6 | 11.9 | 36.7 | 9.8  | 78.3  | 21.7  | 51.4  | -0.064  | -0.095  |
| cox3               | +      | 792       | 41.3 | 13.1 | 33.2 | 12.4 | 74.5  | 25.5  | 53.7  | -0.108  | -0.03   |
| cytb               | +      | 1155      | 42.8 | 13.1 | 34.4 | 9.8  | 77.2  | 22.9  | 52.6  | -0.109  | -0.144  |
| nad1               | -      | 936       | 47.9 | 7.4  | 30.7 | 14.1 | 78.6  | 21.5  | 62    | -0.219  | 0.313   |
| nad2               | +      | 1014      | 47.9 | 9.8  | 36.5 | 5.8  | 84.4  | 15.6  | 53.7  | -0.136  | -0.253  |
| nad3               | +      | 354       | 48.3 | 9.9  | 35.3 | 6.5  | 83.6  | 16.4  | 54.8  | -0.155  | -0.207  |
| nad4               | -      | 1338      | 47.6 | 6.1  | 34.1 | 12.2 | 81.7  | 18.3  | 59.8  | -0.166  | 0.331   |
| nad4L              | -      | 291       | 51.2 | 3.8  | 34   | 11   | 85.2  | 14.8  | 62.2  | -0.202  | 0.488   |
| nad5               | -      | 1743      | 47.1 | 5.7  | 36.2 | 11   | 83.3  | 16.7  | 58.1  | -0.131  | 0.32    |

|             |   |       |      |      |      |      |      |      |      |        |        |
|-------------|---|-------|------|------|------|------|------|------|------|--------|--------|
| nad6        | + | 537   | 45.6 | 8.2  | 41.5 | 4.7  | 87.1 | 12.9 | 50.3 | -0.047 | -0.275 |
| rrnL        | - | 1373  | 40.6 | 5    | 43.9 | 10.6 | 84.5 | 15.6 | 51.2 | 0.04   | 0.362  |
| rrnS        | - | 785   | 40.8 | 4.6  | 44.1 | 10.6 | 84.9 | 15.2 | 51.4 | 0.039  | 0.395  |
| rRNAs       | - | 2158  | 40.6 | 4.8  | 44   | 10.6 | 84.6 | 15.4 | 51.2 | 0.039  | 0.373  |
| tRNAs       | + | 949   | 40.1 | 9.1  | 41.5 | 9.3  | 81.6 | 18.4 | 49.4 | 0.017  | 0.011  |
| tRNAs       | - | 540   | 40.6 | 5    | 42.4 | 12   | 83   | 17   | 52.6 | 0.022  | 0.413  |
| Full genome | + | 15607 | 41   | 11.2 | 40.6 | 7.3  | 81.6 | 18.5 | 48.3 | -0.005 | -0.211 |

**Table S2.15 The nucleotide composition of PCGs in *Dolbina inexacta***

| Regions            | Strand | Size (bp) | T(U) | C    | A    | G    | AT(%) | GC(%) | GT(%) | AT skew | GC skew |
|--------------------|--------|-----------|------|------|------|------|-------|-------|-------|---------|---------|
| PCGs               | +      | 6900      | 42.6 | 12.1 | 35.7 | 9.6  | 78.3  | 21.7  | 52.2  | -0.089  | -0.113  |
| PCGs               | -      | 4311      | 49.7 | 6.2  | 32   | 12.1 | 81.7  | 18.3  | 61.8  | -0.216  | 0.321   |
| 1st codon position | +      | 2300      | 34.7 | 11.7 | 38.4 | 15.2 | 73.1  | 26.9  | 49.9  | 0.051   | 0.128   |
| 1st codon position | -      | 1437      | 41.8 | 5.9  | 36   | 16.4 | 77.8  | 22.3  | 58.2  | -0.074  | 0.469   |
| 2nd codon position | +      | 2300      | 46.4 | 18.5 | 23   | 12.1 | 69.4  | 30.6  | 58.5  | -0.338  | -0.21   |
| 2nd codon position | -      | 1437      | 52.5 | 11.8 | 20.7 | 14.9 | 73.2  | 26.7  | 67.4  | -0.434  | 0.115   |
| 3rd codon position | +      | 2300      | 46.7 | 6    | 45.7 | 1.7  | 92.4  | 7.7   | 48.4  | -0.011  | -0.568  |
| 3rd codon position | -      | 1437      | 54.8 | 0.9  | 39.3 | 5    | 94.1  | 5.9   | 59.8  | -0.164  | 0.694   |
| atp6               | +      | 678       | 42.9 | 12.8 | 36.3 | 8    | 79.2  | 20.8  | 50.9  | -0.084  | -0.234  |
| atp8               | +      | 162       | 45.7 | 8    | 43.8 | 2.5  | 89.5  | 10.5  | 48.2  | -0.021  | -0.529  |
| cox1               | +      | 1533      | 38.7 | 15   | 32.7 | 13.6 | 71.4  | 28.6  | 52.3  | -0.083  | -0.05   |
| cox2               | +      | 682       | 41.6 | 11.6 | 36.2 | 10.6 | 77.8  | 22.2  | 52.2  | -0.07   | -0.046  |
| cox3               | +      | 792       | 40   | 13.8 | 34   | 12.2 | 74    | 26    | 52.2  | -0.082  | -0.058  |
| cytb               | +      | 1155      | 41.6 | 12.8 | 35.3 | 10.2 | 76.9  | 23    | 51.8  | -0.082  | -0.113  |
| nad1               | -      | 936       | 49.3 | 6.8  | 29.8 | 14.1 | 79.1  | 20.9  | 63.4  | -0.246  | 0.347   |
| nad2               | +      | 1014      | 48.7 | 9.3  | 36.2 | 5.8  | 84.9  | 15.1  | 54.5  | -0.148  | -0.229  |
| nad3               | +      | 354       | 44.9 | 10.5 | 37.9 | 6.8  | 82.8  | 17.3  | 51.7  | -0.085  | -0.213  |
| nad4               | -      | 1335      | 49.7 | 6.7  | 31.8 | 11.9 | 81.5  | 18.6  | 61.6  | -0.22   | 0.282   |
| nad4L              | -      | 291       | 52.9 | 3.4  | 32.6 | 11   | 85.5  | 14.4  | 63.9  | -0.237  | 0.524   |
| nad5               | -      | 1749      | 49.4 | 6    | 33.3 | 11.3 | 82.7  | 17.3  | 60.7  | -0.195  | 0.307   |

|             |   |       |      |      |      |      |      |      |      |        |        |
|-------------|---|-------|------|------|------|------|------|------|------|--------|--------|
| nad6        | + | 531   | 46.7 | 7    | 40.9 | 5.5  | 87.6 | 12.5 | 52.2 | -0.067 | -0.121 |
| rrnL        | - | 1401  | 42.5 | 5    | 41.8 | 10.8 | 84.3 | 15.8 | 53.3 | -0.008 | 0.367  |
| rrnS        | - | 812   | 41.5 | 4.8  | 44.1 | 9.6  | 85.6 | 14.4 | 51.1 | 0.03   | 0.333  |
| rRNAs       | - | 2213  | 42.1 | 4.9  | 42.6 | 10.3 | 84.7 | 15.2 | 52.4 | 0.006  | 0.355  |
| tRNAs       | + | 933   | 39   | 9.2  | 42.2 | 9.5  | 81.2 | 18.7 | 48.5 | 0.04   | 0.017  |
| tRNAs       | - | 532   | 41.2 | 5.3  | 41.4 | 12.2 | 82.6 | 17.5 | 53.4 | 0.002  | 0.398  |
| Full genome | + | 15232 | 39.6 | 11.5 | 41.3 | 7.6  | 80.9 | 19.1 | 47.2 | 0.022  | -0.2   |



**Table S2.16 The nucleotide composition of PCGs in *Dolbina paraexacta***

| Regions            | Strand | Size (bp) | T(U) | C    | A    | G    | AT(%) | GC(%) | GT(%) | AT skew | GC skew |
|--------------------|--------|-----------|------|------|------|------|-------|-------|-------|---------|---------|
| PCGs               | +      | 6900      | 43   | 11.6 | 35.9 | 9.5  | 78.9  | 21.1  | 52.5  | -0.09   | -0.1    |
| PCGs               | -      | 4311      | 49.6 | 6.3  | 32.1 | 12   | 81.7  | 18.3  | 61.6  | -0.214  | 0.311   |
| 1st codon position | +      | 2300      | 35   | 11.4 | 38.4 | 15.2 | 73.4  | 26.6  | 50.2  | 0.047   | 0.142   |
| 1st codon position | -      | 1437      | 41.7 | 5.9  | 36   | 16.4 | 77.7  | 22.3  | 58.1  | -0.073  | 0.469   |
| 2nd codon position | +      | 2300      | 46.4 | 18.5 | 23   | 12.1 | 69.4  | 30.6  | 58.5  | -0.338  | -0.209  |
| 2nd codon position | -      | 1437      | 52.5 | 11.9 | 20.7 | 15   | 73.2  | 26.9  | 67.5  | -0.435  | 0.114   |
| 3rd codon position | +      | 2300      | 47.7 | 4.9  | 46.3 | 1.2  | 94    | 6.1   | 48.9  | -0.014  | -0.612  |
| 3rd codon position | -      | 1437      | 54.6 | 1.1  | 39.6 | 4.7  | 94.2  | 5.8   | 59.3  | -0.159  | 0.619   |
| atp6               | +      | 678       | 42.9 | 12.7 | 36.6 | 7.8  | 79.5  | 20.5  | 50.7  | -0.08   | -0.237  |
| atp8               | +      | 162       | 45.1 | 8    | 44.4 | 2.5  | 89.5  | 10.5  | 47.6  | -0.007  | -0.529  |
| cox1               | +      | 1533      | 39   | 14.3 | 33.3 | 13.4 | 72.3  | 27.7  | 52.4  | -0.079  | -0.031  |
| cox2               | +      | 682       | 41.8 | 11.4 | 36.8 | 10   | 78.6  | 21.4  | 51.8  | -0.063  | -0.068  |
| cox3               | +      | 792       | 40.9 | 12.6 | 34.1 | 12.4 | 75    | 25    | 53.3  | -0.091  | -0.01   |
| cytb               | +      | 1155      | 42.3 | 12.4 | 35.5 | 9.8  | 77.8  | 22.2  | 52.1  | -0.088  | -0.117  |
| nad1               | -      | 936       | 48.5 | 7.5  | 29.4 | 14.6 | 77.9  | 22.1  | 63.1  | -0.246  | 0.324   |
| nad2               | +      | 1014      | 49.1 | 8.9  | 36.2 | 5.8  | 85.3  | 14.7  | 54.9  | -0.151  | -0.208  |
| nad3               | +      | 354       | 46   | 9.3  | 38.1 | 6.5  | 84.1  | 15.8  | 52.5  | -0.094  | -0.179  |
| nad4               | -      | 1335      | 50   | 6.4  | 32   | 11.6 | 82    | 18    | 61.6  | -0.219  | 0.286   |
| nad4L              | -      | 291       | 52.6 | 4.1  | 32.6 | 10.7 | 85.2  | 14.8  | 63.3  | -0.234  | 0.442   |
| nad5               | -      | 1749      | 49.3 | 5.9  | 33.6 | 11.1 | 82.9  | 17    | 60.4  | -0.19   | 0.304   |

|             |   |       |      |      |      |      |      |      |      |        |        |
|-------------|---|-------|------|------|------|------|------|------|------|--------|--------|
| nad6        | + | 531   | 46.7 | 7.2  | 40.3 | 5.8  | 87   | 13   | 52.5 | -0.074 | -0.101 |
| rrnL        | - | 1391  | 42.6 | 5    | 41.6 | 10.8 | 84.2 | 15.8 | 53.4 | -0.011 | 0.364  |
| rrnS        | - | 777   | 42.3 | 4.5  | 43.5 | 9.7  | 85.8 | 14.2 | 52   | 0.013  | 0.364  |
| rRNAs       | - | 2168  | 42.5 | 4.8  | 42.3 | 10.4 | 84.8 | 15.2 | 52.9 | -0.002 | 0.364  |
| tRNAs       | + | 935   | 39.4 | 8.8  | 42.4 | 9.5  | 81.8 | 18.3 | 48.9 | 0.037  | 0.041  |
| tRNAs       | - | 532   | 40.8 | 5.1  | 41.4 | 12.8 | 82.2 | 17.9 | 53.6 | 0.007  | 0.432  |
| Full genome | + | 15220 | 39.8 | 11.2 | 41.4 | 7.6  | 81.2 | 18.8 | 47.4 | 0.02   | -0.192 |

**Table S2.17 The nucleotide composition of PCGs in *Olivenebula oberthueri***

| Regions            | Strand | Size (bp) | T(U) | C    | A    | G    | AT(%) | GC(%) | GT(%) | AT skew | GC skew |
|--------------------|--------|-----------|------|------|------|------|-------|-------|-------|---------|---------|
| PCGs               | +      | 6903      | 42.5 | 13.4 | 33.9 | 10.2 | 76.4  | 23.6  | 52.7  | -0.113  | -0.137  |
| PCGs               | -      | 4314      | 47.4 | 6.6  | 32.8 | 13.2 | 80.2  | 19.8  | 60.6  | -0.182  | 0.336   |
| 1st codon position | +      | 2301      | 34.8 | 12.6 | 36.3 | 16.3 | 71.1  | 28.9  | 51.1  | 0.021   | 0.129   |
| 1st codon position | -      | 1438      | 40   | 6.3  | 36.5 | 17.2 | 76.5  | 23.5  | 57.2  | -0.045  | 0.467   |
| 2nd codon position | +      | 2301      | 46.2 | 18.9 | 22.6 | 12.3 | 68.8  | 31.2  | 58.5  | -0.343  | -0.209  |
| 2nd codon position | -      | 1438      | 51.5 | 12.2 | 21.1 | 15.2 | 72.6  | 27.4  | 66.7  | -0.42   | 0.107   |
| 3rd codon position | +      | 2301      | 46.6 | 8.8  | 42.8 | 1.9  | 89.4  | 10.7  | 48.5  | -0.043  | -0.649  |
| 3rd codon position | -      | 1438      | 50.7 | 1.3  | 40.8 | 7.3  | 91.5  | 8.6   | 58    | -0.109  | 0.707   |
| atp6               | +      | 678       | 43.2 | 14.3 | 34.4 | 8.1  | 77.6  | 22.4  | 51.3  | -0.114  | -0.276  |
| atp8               | +      | 162       | 46.3 | 5.6  | 45.1 | 3.1  | 91.4  | 8.7   | 49.4  | -0.014  | -0.286  |
| cox1               | +      | 1536      | 39.9 | 15   | 31   | 14.1 | 70.9  | 29.1  | 54    | -0.126  | -0.029  |
| cox2               | +      | 682       | 39.3 | 14.2 | 36.2 | 10.3 | 75.5  | 24.5  | 49.6  | -0.041  | -0.162  |
| cox3               | +      | 789       | 39.2 | 15.2 | 31.6 | 14.1 | 70.8  | 29.3  | 53.3  | -0.108  | -0.039  |
| cytb               | +      | 1152      | 41.4 | 14.3 | 33.8 | 10.5 | 75.2  | 24.8  | 51.9  | -0.102  | -0.154  |
| nad1               | -      | 939       | 47.7 | 7.7  | 29.5 | 15.1 | 77.2  | 22.8  | 62.8  | -0.236  | 0.327   |
| nad2               | +      | 1014      | 48.8 | 10.5 | 34.1 | 6.6  | 82.9  | 17.1  | 55.4  | -0.177  | -0.225  |
| nad3               | +      | 357       | 46.5 | 11.2 | 35.6 | 6.7  | 82.1  | 17.9  | 53.2  | -0.133  | -0.25   |
| nad4               | -      | 1340      | 46.9 | 6.5  | 33.9 | 12.8 | 80.8  | 19.3  | 59.7  | -0.161  | 0.326   |
| nad4L              | -      | 291       | 53.3 | 4.1  | 29.9 | 12.7 | 83.2  | 16.8  | 66    | -0.281  | 0.51    |
| nad5               | -      | 1746      | 46.7 | 6.5  | 34.2 | 12.7 | 80.9  | 19.2  | 59.4  | -0.154  | 0.323   |

|             |   |       |      |      |      |      |      |      |      |        |        |
|-------------|---|-------|------|------|------|------|------|------|------|--------|--------|
| nad6        | + | 534   | 44.9 | 11.6 | 37.3 | 6.2  | 82.2 | 17.8 | 51.1 | -0.093 | -0.305 |
| rrnL        | - | 1354  | 41.1 | 4.9  | 42.3 | 11.7 | 83.4 | 16.6 | 52.8 | 0.014  | 0.411  |
| rrnS        | - | 814   | 41.9 | 4.9  | 43.5 | 9.7  | 85.4 | 14.6 | 51.6 | 0.019  | 0.328  |
| rRNAs       | - | 2168  | 41.4 | 4.9  | 42.8 | 10.9 | 84.2 | 15.8 | 52.3 | 0.016  | 0.382  |
| tRNAs       | + | 939   | 39.7 | 9.4  | 41.1 | 9.8  | 80.8 | 19.2 | 49.5 | 0.017  | 0.022  |
| tRNAs       | - | 529   | 39.7 | 5.7  | 42.2 | 12.5 | 81.9 | 18.2 | 52.2 | 0.03   | 0.375  |
| Full genome | + | 15457 | 39.8 | 12.4 | 39.9 | 7.9  | 79.7 | 20.3 | 47.7 | 0      | -0.22  |

**Table S3.1 The characteristics of coding amino acids in *Zaranga tukuringra***

| <b>AA</b>           | <b>Count</b> | <b>%</b> |
|---------------------|--------------|----------|
| Phe(F)              | 366          | 9.84     |
| Leu2(L2)            | 454          | 12.2     |
| Leu1(L1)            | 103          | 2.77     |
| Ile(I)              | 448          | 12.04    |
| Met(M)              | 283          | 7.61     |
| Val(V)              | 145          | 3.9      |
| Ser2(S2)            | 201          | 5.4      |
| Pro(P)              | 126          | 3.39     |
| Thr(T)              | 162          | 4.35     |
| Ala(A)              | 127          | 3.41     |
| Tyr(Y)              | 188          | 5.05     |
| His(H)              | 67           | 1.8      |
| Gln(Q)              | 62           | 1.67     |
| Asn(N)              | 252          | 6.77     |
| Lys(K)              | 101          | 2.71     |
| Asp(D)              | 65           | 1.75     |
| Glu(E)              | 73           | 1.96     |
| Cys(C)              | 31           | 0.83     |
| Trp(W)              | 96           | 2.58     |
| Arg(R)              | 53           | 1.42     |
| Ser1(S1)            | 119          | 3.2      |
| Gly(G)              | 199          | 5.35     |
| codon end in A or T | 3289         | 88.39    |
| codon end in G or T | 1944         | 52.24    |
| Total               | 3721         |          |

**Table S3.2 The characteristics of coding amino acids in *Gazalina chrysolopha***

| <b>AA</b>           | <b>Count</b> | <b>%</b> |
|---------------------|--------------|----------|
| Phe(F)              | 358          | 9.58     |
| Leu2(L2)            | 421          | 11.26    |
| Leu1(L1)            | 137          | 3.67     |
| Ile(I)              | 423          | 11.32    |
| Met(M)              | 280          | 7.49     |
| Val(V)              | 178          | 4.76     |
| Ser2(S2)            | 202          | 5.4      |
| Pro(P)              | 134          | 3.58     |
| Thr(T)              | 162          | 4.33     |
| Ala(A)              | 125          | 3.34     |
| Tyr(Y)              | 181          | 4.84     |
| His(H)              | 71           | 1.9      |
| Gln(Q)              | 65           | 1.74     |
| Asn(N)              | 253          | 6.77     |
| Lys(K)              | 104          | 2.78     |
| Asp(D)              | 65           | 1.74     |
| Glu(E)              | 73           | 1.95     |
| Cys(C)              | 33           | 0.88     |
| Trp(W)              | 96           | 2.57     |
| Arg(R)              | 53           | 1.42     |
| Ser1(S1)            | 118          | 3.16     |
| Gly(G)              | 206          | 5.51     |
| codon end in A or T | 3007         | 80.44    |
| codon end in G or T | 1884         | 50.4     |
| Total               | 3738         |          |

**Table S3.3 The characteristics of coding amino acids in *Deroca hyalina***

| <b>AA</b>           | <b>Count</b> | <b>%</b> |
|---------------------|--------------|----------|
| Phe(F)              | 370          | 9.9      |
| Leu2(L2)            | 494          | 13.22    |
| Leu1(L1)            | 50           | 1.34     |
| Ile(I)              | 459          | 12.28    |
| Met(M)              | 317          | 8.48     |
| Val(V)              | 128          | 3.42     |
| Ser2(S2)            | 209          | 5.59     |
| Pro(P)              | 122          | 3.26     |
| Thr(T)              | 147          | 3.93     |
| Ala(A)              | 124          | 3.32     |
| Tyr(Y)              | 187          | 5        |
| His(H)              | 68           | 1.82     |
| Gln(Q)              | 67           | 1.79     |
| Asn(N)              | 266          | 7.12     |
| Lys(K)              | 112          | 3        |
| Asp(D)              | 63           | 1.69     |
| Glu(E)              | 74           | 1.98     |
| Cys(C)              | 31           | 0.83     |
| Trp(W)              | 95           | 2.54     |
| Arg(R)              | 53           | 1.42     |
| Ser1(S1)            | 112          | 3        |
| Gly(G)              | 190          | 5.08     |
| codon end in A or T | 3515         | 94.03    |
| codon end in G or T | 1969         | 52.68    |
| Total               | 3738         |          |

**Table S3.4 The characteristics of coding amino acids in *Menophra* *sp.***

| <b>AA</b>           | <b>Count</b> | <b>%</b> |
|---------------------|--------------|----------|
| Phe(F)              | 359          | 9.61     |
| Leu2(L2)            | 529          | 14.17    |
| Leu1(L1)            | 43           | 1.15     |
| Ile(I)              | 455          | 12.19    |
| Met(M)              | 271          | 7.26     |
| Val(V)              | 151          | 4.04     |
| Ser2(S2)            | 205          | 5.49     |
| Pro(P)              | 122          | 3.27     |
| Thr(T)              | 144          | 3.86     |
| Ala(A)              | 128          | 3.43     |
| Tyr(Y)              | 200          | 5.36     |
| His(H)              | 67           | 1.79     |
| Gln(Q)              | 60           | 1.61     |
| Asn(N)              | 262          | 7.02     |
| Lys(K)              | 105          | 2.81     |
| Asp(D)              | 67           | 1.79     |
| Glu(E)              | 74           | 1.98     |
| Cys(C)              | 34           | 0.91     |
| Trp(W)              | 96           | 2.57     |
| Arg(R)              | 53           | 1.42     |
| Ser1(S1)            | 113          | 3.03     |
| Gly(G)              | 196          | 5.25     |
| codon end in A or T | 3485         | 93.33    |
| codon end in G or T | 1998         | 53.51    |
| Total               | 3734         |          |



**Table S3.5 The characteristics of coding amino acids in *Dolbina paraexacta***

| <b>AA</b>           | <b>Count</b> | <b>%</b> |
|---------------------|--------------|----------|
| Phe(F)              | 377          | 10.12    |
| Leu2(L2)            | 502          | 13.48    |
| Leu1(L1)            | 42           | 1.13     |
| Ile(I)              | 468          | 12.56    |
| Met(M)              | 303          | 8.13     |
| Val(V)              | 130          | 3.49     |
| Ser2(S2)            | 199          | 5.34     |
| Pro(P)              | 126          | 3.38     |
| Thr(T)              | 149          | 4        |
| Ala(A)              | 122          | 3.28     |
| Tyr(Y)              | 186          | 4.99     |
| His(H)              | 67           | 1.8      |
| Gln(Q)              | 61           | 1.64     |
| Asn(N)              | 259          | 6.95     |
| Lys(K)              | 105          | 2.82     |
| Asp(D)              | 65           | 1.74     |
| Glu(E)              | 71           | 1.91     |
| Cys(C)              | 30           | 0.81     |
| Trp(W)              | 97           | 2.6      |
| Arg(R)              | 52           | 1.4      |
| Ser1(S1)            | 117          | 3.14     |
| Gly(G)              | 197          | 5.29     |
| codon end in A or T | 3514         | 94.34    |
| codon end in G or T | 1975         | 53.02    |
| Total               | 3725         |          |

**Table S3.6 The characteristics of coding amino acids in *Lassaba albidaria***

| <b>AA</b>           | <b>Count</b> | <b>%</b> |
|---------------------|--------------|----------|
| Phe(F)              | 337          | 9.72     |
| Leu2(L2)            | 325          | 9.37     |
| Leu1(L1)            | 98           | 2.83     |
| Ile(I)              | 361          | 10.41    |
| Met(M)              | 274          | 7.9      |
| Val(V)              | 132          | 3.81     |
| Ser2(S2)            | 151          | 4.35     |
| Pro(P)              | 66           | 1.9      |
| Thr(T)              | 106          | 3.06     |
| Ala(A)              | 61           | 1.76     |
| Tyr(Y)              | 210          | 6.06     |
| His(H)              | 59           | 1.7      |
| Gln(Q)              | 59           | 1.7      |
| Asn(N)              | 356          | 10.27    |
| Lys(K)              | 340          | 9.8      |
| Asp(D)              | 73           | 2.1      |
| Glu(E)              | 83           | 2.39     |
| Cys(C)              | 50           | 1.44     |
| Trp(W)              | 86           | 2.48     |
| Arg(R)              | 31           | 0.89     |
| Ser1(S1)            | 135          | 3.89     |
| Gly(G)              | 75           | 2.16     |
| codon end in A or T | 3102         | 89.45    |
| codon end in G or T | 1911         | 55.1     |
| Total               | 3468         |          |

**Table S3.7 The characteristics of coding amino acids in  
*Sphragifera sigillata***

| <b>AA</b>           | <b>Count</b> | <b>%</b> |
|---------------------|--------------|----------|
| Phe(F)              | 376          | 10.1     |
| Leu2(L2)            | 493          | 13.24    |
| Leu1(L1)            | 49           | 1.32     |
| Ile(I)              | 479          | 12.86    |
| Met(M)              | 269          | 7.22     |
| Val(V)              | 140          | 3.76     |
| Ser2(S2)            | 209          | 5.61     |
| Pro(P)              | 125          | 3.36     |
| Thr(T)              | 146          | 3.92     |
| Ala(A)              | 125          | 3.36     |
| Tyr(Y)              | 186          | 4.99     |
| His(H)              | 67           | 1.8      |
| Gln(Q)              | 61           | 1.64     |
| Asn(N)              | 254          | 6.82     |
| Lys(K)              | 106          | 2.85     |
| Asp(D)              | 65           | 1.75     |
| Glu(E)              | 72           | 1.93     |
| Cys(C)              | 32           | 0.86     |
| Trp(W)              | 99           | 2.66     |
| Arg(R)              | 53           | 1.42     |
| Ser1(S1)            | 119          | 3.2      |
| Gly(G)              | 199          | 5.34     |
| codon end in A or T | 3572         | 95.92    |
| codon end in G or T | 2030         | 54.51    |
| Total               | 3724         |          |

**Table S3.8 The characteristics of coding amino acids in *Asota tortuosa***

| <b>AA</b>           | <b>Count</b> | <b>%</b> |
|---------------------|--------------|----------|
| Phe(F)              | 357          | 9.59     |
| Leu2(L2)            | 476          | 12.78    |
| Leu1(L1)            | 62           | 1.66     |
| Ile(I)              | 471          | 12.65    |
| Met(M)              | 293          | 7.87     |
| Val(V)              | 140          | 3.76     |
| Ser2(S2)            | 209          | 5.61     |
| Pro(P)              | 126          | 3.38     |
| Thr(T)              | 143          | 3.84     |
| Ala(A)              | 125          | 3.36     |
| Tyr(Y)              | 199          | 5.34     |
| His(H)              | 64           | 1.72     |
| Gln(Q)              | 62           | 1.66     |
| Asn(N)              | 251          | 6.74     |
| Lys(K)              | 106          | 2.85     |
| Asp(D)              | 67           | 1.8      |
| Glu(E)              | 76           | 2.04     |
| Cys(C)              | 32           | 0.86     |
| Trp(W)              | 95           | 2.55     |
| Arg(R)              | 53           | 1.42     |
| Ser1(S1)            | 119          | 3.2      |
| Gly(G)              | 198          | 5.32     |
| codon end in A or T | 3464         | 93.02    |
| codon end in G or T | 2001         | 53.73    |
| Total               | 3724         |          |

**Table S3.9 The characteristics of coding amino acids in *Olivenebula oberthueri***

| <b>AA</b>           | <b>Count</b> | <b>%</b> |
|---------------------|--------------|----------|
| Phe(F)              | 366          | 9.82     |
| Leu2(L2)            | 478          | 12.82    |
| Leu1(L1)            | 73           | 1.96     |
| Ile(I)              | 455          | 12.2     |
| Met(M)              | 277          | 7.43     |
| Val(V)              | 155          | 4.16     |
| Ser2(S2)            | 204          | 5.47     |
| Pro(P)              | 125          | 3.35     |
| Thr(T)              | 151          | 4.05     |
| Ala(A)              | 130          | 3.49     |
| Tyr(Y)              | 190          | 5.1      |
| His(H)              | 67           | 1.8      |
| Gln(Q)              | 62           | 1.66     |
| Asn(N)              | 244          | 6.55     |
| Lys(K)              | 107          | 2.87     |
| Asp(D)              | 68           | 1.82     |
| Glu(E)              | 74           | 1.98     |
| Cys(C)              | 29           | 0.78     |
| Trp(W)              | 97           | 2.6      |
| Arg(R)              | 53           | 1.42     |
| Ser1(S1)            | 126          | 3.38     |
| Gly(G)              | 197          | 5.28     |
| codon end in A or T | 3371         | 90.42    |
| codon end in G or T | 1949         | 52.28    |
| Total               | 3728         |          |

**Table S3.10 The characteristics of coding amino acids in *Psyra falcipennis***

| <b>AA</b>           | <b>Count</b> | <b>%</b> |
|---------------------|--------------|----------|
| Phe(F)              | 358          | 9.61     |
| Leu2(L2)            | 511          | 13.71    |
| Leu1(L1)            | 38           | 1.02     |
| Ile(I)              | 443          | 11.89    |
| Met(M)              | 287          | 7.7      |
| Val(V)              | 153          | 4.11     |
| Ser2(S2)            | 204          | 5.47     |
| Pro(P)              | 121          | 3.25     |
| Thr(T)              | 152          | 4.08     |
| Ala(A)              | 128          | 3.43     |
| Tyr(Y)              | 199          | 5.34     |
| His(H)              | 66           | 1.77     |
| Gln(Q)              | 58           | 1.56     |
| Asn(N)              | 266          | 7.14     |
| Lys(K)              | 106          | 2.84     |
| Asp(D)              | 65           | 1.74     |
| Glu(E)              | 75           | 2.01     |
| Cys(C)              | 37           | 0.99     |
| Trp(W)              | 96           | 2.58     |
| Arg(R)              | 53           | 1.42     |
| Ser1(S1)            | 113          | 3.03     |
| Gly(G)              | 198          | 5.31     |
| codon end in A or T | 3486         | 93.53    |
| codon end in G or T | 1985         | 53.26    |
| Total               | 3727         |          |

**Table S3.11 The characteristics of coding amino acids in *Numenes albofascia***

| <b>AA</b>           | <b>Count</b> | <b>%</b> |
|---------------------|--------------|----------|
| Phe(F)              | 309          | 9.78     |
| Leu2(L2)            | 399          | 12.63    |
| Leu1(L1)            | 78           | 2.47     |
| Ile(I)              | 377          | 11.94    |
| Met(M)              | 228          | 7.22     |
| Val(V)              | 140          | 4.43     |
| Ser2(S2)            | 186          | 5.89     |
| Pro(P)              | 106          | 3.36     |
| Thr(T)              | 112          | 3.55     |
| Ala(A)              | 102          | 3.23     |
| Tyr(Y)              | 157          | 4.97     |
| His(H)              | 59           | 1.87     |
| Gln(Q)              | 47           | 1.49     |
| Asn(N)              | 204          | 6.46     |
| Lys(K)              | 88           | 2.79     |
| Asp(D)              | 52           | 1.65     |
| Glu(E)              | 71           | 2.25     |
| Cys(C)              | 28           | 0.89     |
| Trp(W)              | 82           | 2.6      |
| Arg(R)              | 45           | 1.42     |
| Ser1(S1)            | 115          | 3.64     |
| Gly(G)              | 173          | 5.48     |
| codon end in A or T | 2749         | 87.05    |
| codon end in G or T | 1687         | 53.42    |
| Total               | 3158         |          |

**Table S3.12 The characteristics of coding amino acids in *Rhagastis albomarginatus***

| <b>AA</b>           | <b>Count</b> | <b>%</b> |
|---------------------|--------------|----------|
| Phe(F)              | 322          | 9.65     |
| Leu2(L2)            | 445          | 13.33    |
| Leu1(L1)            | 50           | 1.5      |
| Ile(I)              | 415          | 12.43    |
| Met(M)              | 248          | 7.43     |
| Val(V)              | 117          | 3.51     |
| Ser2(S2)            | 176          | 5.27     |
| Pro(P)              | 119          | 3.57     |
| Thr(T)              | 146          | 4.37     |
| Ala(A)              | 101          | 3.03     |
| Tyr(Y)              | 186          | 5.57     |
| His(H)              | 62           | 1.86     |
| Gln(Q)              | 58           | 1.74     |
| Asn(N)              | 237          | 7.1      |
| Lys(K)              | 95           | 2.85     |
| Asp(D)              | 53           | 1.59     |
| Glu(E)              | 68           | 2.04     |
| Cys(C)              | 27           | 0.81     |
| Trp(W)              | 89           | 2.67     |
| Arg(R)              | 48           | 1.44     |
| Ser1(S1)            | 98           | 2.94     |
| Gly(G)              | 178          | 5.33     |
| codon end in A or T | 3083         | 92.36    |
| codon end in G or T | 1702         | 50.99    |
| Total               | 3338         |          |



**Table S3.13 The characteristics of coding amino acids in *Dolbina inexacta***

| <b>AA</b>           | <b>Count</b> | <b>%</b> |
|---------------------|--------------|----------|
| Phe(F)              | 379          | 10.17    |
| Leu2(L2)            | 500          | 13.42    |
| Leu1(L1)            | 48           | 1.29     |
| Ile(I)              | 467          | 12.54    |
| Met(M)              | 299          | 8.03     |
| Val(V)              | 130          | 3.49     |
| Ser2(S2)            | 195          | 5.23     |
| Pro(P)              | 126          | 3.38     |
| Thr(T)              | 152          | 4.08     |
| Ala(A)              | 123          | 3.3      |
| Tyr(Y)              | 185          | 4.97     |
| His(H)              | 68           | 1.83     |
| Gln(Q)              | 61           | 1.64     |
| Asn(N)              | 259          | 6.95     |
| Lys(K)              | 105          | 2.82     |
| Asp(D)              | 65           | 1.74     |
| Glu(E)              | 71           | 1.91     |
| Cys(C)              | 30           | 0.81     |
| Trp(W)              | 97           | 2.6      |
| Arg(R)              | 52           | 1.4      |
| Ser1(S1)            | 118          | 3.17     |
| Gly(G)              | 195          | 5.23     |
| codon end in A or T | 3476         | 93.32    |
| codon end in G or T | 1971         | 52.91    |
| Total               | 3725         |          |

**Table S3.14 The characteristics of coding amino acids in**  
***Paralebeda femorata***

| <b>AA</b>           | <b>Count</b> | <b>%</b> |
|---------------------|--------------|----------|
| Phe(F)              | 368          | 9.86     |
| Leu2(L2)            | 456          | 12.22    |
| Leu1(L1)            | 72           | 1.93     |
| Ile(I)              | 426          | 11.41    |
| Met(M)              | 310          | 8.31     |
| Val(V)              | 166          | 4.45     |
| Ser2(S2)            | 211          | 5.65     |
| Pro(P)              | 121          | 3.24     |
| Thr(T)              | 164          | 4.39     |
| Ala(A)              | 124          | 3.32     |
| Tyr(Y)              | 189          | 5.06     |
| His(H)              | 67           | 1.8      |
| Gln(Q)              | 64           | 1.71     |
| Asn(N)              | 252          | 6.75     |
| Lys(K)              | 100          | 2.68     |
| Asp(D)              | 64           | 1.71     |
| Glu(E)              | 73           | 1.96     |
| Cys(C)              | 28           | 0.75     |
| Trp(W)              | 97           | 2.6      |
| Arg(R)              | 53           | 1.42     |
| Ser1(S1)            | 123          | 3.3      |
| Gly(G)              | 204          | 5.47     |
| codon end in A or T | 3363         | 90.11    |
| codon end in G or T | 1902         | 50.96    |
| Total               | 3732         |          |

**Table S3.15 The characteristics of coding amino acids in *Zeuzera pyrina***

| <b>AA</b>           | <b>Count</b> | <b>%</b> |
|---------------------|--------------|----------|
| Phe(F)              | 363          | 9.71     |
| Leu2(L2)            | 476          | 12.74    |
| Leu1(L1)            | 98           | 2.62     |
| Ile(I)              | 454          | 12.15    |
| Met(M)              | 256          | 6.85     |
| Val(V)              | 160          | 4.28     |
| Ser2(S2)            | 214          | 5.73     |
| Pro(P)              | 126          | 3.37     |
| Thr(T)              | 157          | 4.2      |
| Ala(A)              | 127          | 3.4      |
| Tyr(Y)              | 184          | 4.92     |
| His(H)              | 66           | 1.77     |
| Gln(Q)              | 64           | 1.71     |
| Asn(N)              | 234          | 6.26     |
| Lys(K)              | 104          | 2.78     |
| Asp(D)              | 67           | 1.79     |
| Glu(E)              | 74           | 1.98     |
| Cys(C)              | 32           | 0.86     |
| Trp(W)              | 98           | 2.62     |
| Arg(R)              | 50           | 1.34     |
| Ser1(S1)            | 134          | 3.59     |
| Gly(G)              | 199          | 5.33     |
| codon end in A or T | 3317         | 88.76    |
| codon end in G or T | 1974         | 52.82    |
| Total               | 3737         |          |

**Table S3.16 The characteristics of coding amino acids in**  
***Phyllosphingia dissimilis***

| <b>AA</b>           | <b>Count</b> | <b>%</b> |
|---------------------|--------------|----------|
| Phe(F)              | 385          | 10.32    |
| Leu2(L2)            | 505          | 13.54    |
| Leu1(L1)            | 45           | 1.21     |
| Ile(I)              | 466          | 12.49    |
| Met(M)              | 284          | 7.61     |
| Val(V)              | 133          | 3.56     |
| Ser2(S2)            | 203          | 5.44     |
| Pro(P)              | 121          | 3.24     |
| Thr(T)              | 144          | 3.86     |
| Ala(A)              | 122          | 3.27     |
| Tyr(Y)              | 207          | 5.55     |
| His(H)              | 66           | 1.77     |
| Gln(Q)              | 64           | 1.72     |
| Asn(N)              | 263          | 7.05     |
| Lys(K)              | 106          | 2.84     |
| Asp(D)              | 62           | 1.66     |
| Glu(E)              | 72           | 1.93     |
| Cys(C)              | 31           | 0.83     |
| Trp(W)              | 93           | 2.49     |
| Arg(R)              | 53           | 1.42     |
| Ser1(S1)            | 110          | 2.95     |
| Gly(G)              | 196          | 5.25     |
| codon end in A or T | 3576         | 95.85    |
| codon end in G or T | 2023         | 54.22    |
| Total               | 3731         |          |

**Table S3.17 The characteristics of coding amino acids in**  
***Hyalinetta circumflexa***

| <b>AA</b>           | <b>Count</b> | <b>%</b> |
|---------------------|--------------|----------|
| Phe(F)              | 363          | 9.73     |
| Leu2(L2)            | 500          | 13.4     |
| Leu1(L1)            | 48           | 1.29     |
| Ile(I)              | 461          | 12.36    |
| Met(M)              | 303          | 8.12     |
| Val(V)              | 141          | 3.78     |
| Ser2(S2)            | 196          | 5.25     |
| Pro(P)              | 124          | 3.32     |
| Thr(T)              | 145          | 3.89     |
| Ala(A)              | 124          | 3.32     |
| Tyr(Y)              | 207          | 5.55     |
| His(H)              | 70           | 1.88     |
| Gln(Q)              | 60           | 1.61     |
| Asn(N)              | 259          | 6.94     |
| Lys(K)              | 104          | 2.79     |
| Asp(D)              | 61           | 1.64     |
| Glu(E)              | 73           | 1.96     |
| Cys(C)              | 32           | 0.86     |
| Trp(W)              | 94           | 2.52     |
| Arg(R)              | 53           | 1.42     |
| Ser1(S1)            | 114          | 3.06     |
| Gly(G)              | 198          | 5.31     |
| codon end in A or T | 3525         | 94.5     |
| codon end in G or T | 1908         | 51.15    |
| Total               | 3730         |          |
